# Supplementary material for: Control of craniofacial development by the collagen receptor, discoidin domain receptor 2
Source: eLife journal article supplement (doi:10.7554/elife.77257), 2023-01-19
Supplement: supp [file elife-77257-supp-v1.zip]

Archive with 16 entries (16 files):
- elife_poa_e77257_Figure_1_figure_supplement_1.pdf
- elife_poa_e77257_Figure_2_figure_supplement_1.pdf
- elife_poa_e77257_Figure_3_figure_supplement_1.pdf
- elife_poa_e77257_Figure_3_digure_supplement_2.pdf
- elife_poa_e77257_Figure_4_figure_supplement_1.pdf
- elife_poa_e77257_Figure_5_figure_supplement_1.pdf
- elife_poa_e77257_Figure_5_figure_supplement_2.pdf
- elife_poa_e77257_Figure_7_figure_supplement_1.pdf
- elife_poa_e77257_Figure_7_figure_supplement_2.pdf
- elife_poa_e77257_Figure_1_source_data_1.xlsx
- elife_poa_e77257_Figure_2_source_data_1.xlsx
- elife_poa_e77257_Figure_2_source_data_2.xlsx
- elife_poa_e77257_Figure_6_source_data_1.xlsx
- elife_poa_e77257_Figure_7_source_data_1.xlsx
- elife_poa_e77257_Figure_7_source_data_2.xlsx
- elife_poa_e77257_Transparent_Reporting_File.pdf
