# Supplementary material for: Control of craniofacial development by the collagen receptor, discoidin domain receptor 2
Source: eLife journal article supplement (doi:10.7554/elife.77257), 2023-01-19
Supplement: supp [file elife-77257-supp-v1.zip › elife_poa_e77257_Figure_1_figure_supplement_1.pdf]

## Figure 1-figure supplement 1

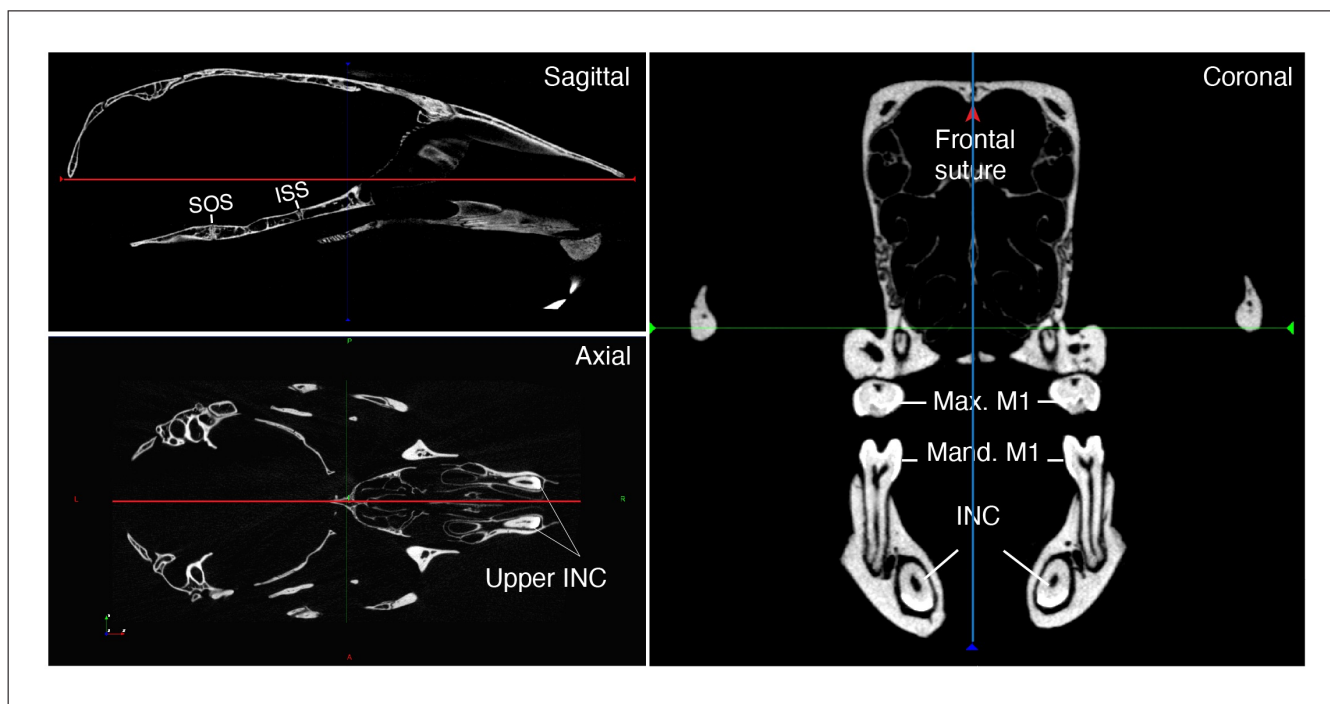

**Figure 1-figure supplement 1. Orientation of skulls in sagittal, axial and coronal planes.** Max: Maxillary; Mand: Mandibular; M1: first molar; INC: Incisor; ISS: Intersphenoid synchondrosis; SOS: Spheno-occipital synchondrosis.
