# Supplementary material for: Control of craniofacial development by the collagen receptor, discoidin domain receptor 2
Source: eLife journal article supplement (doi:10.7554/elife.77257), 2023-01-19
Supplement: supp [file elife-77257-supp-v1.zip › elife_poa_e77257_Figure_1_source_data_1.xlsx]

## Sheet: Skull linear measurements
Skull linear measurments-Global-Ddr2 Slie vs WT 3months
KO	1	2	3	4	5	6	7	8	9	10
ID:Label (AP measurements)	11352_KOM1	11353_KOM2	11354_KOM3	11448_KOF1	11449_KOF2	11450_KOF3	11492_KOF4	11452_KOM1	11453_KOM2	11455_KOM3	Ave	SD
skull length (SL)-mm	19.059	18.258	18.016	16.954	19.008	18.671	17.949	19.497	18.197	18.565	18.4174	0.715552
Nasal bone (NB)	6.428	5.666	5.708	5.636	6.084	5.864	5.752	6.305	5.764	5.998	5.9205	0.275898
cranial vault (CV)	12.631	12.564	12.277	11.303	12.913	12.758	12.181	13.187	12.417	12.519	12.475	0.507243
Ant. Cranial base (ACB)	2.26	2.588	2.315	1.976	2.52	2.434	2.352	2.624	2.541	2.237	2.3847	0.198352
post. Cranial base (PCB)	8.48	8.115	8.351	7.795	7.907	7.923	7.847	8.236	7.527	7.981	8.0162	0.283627
Ant facial height (AFH)	3.38	3.319	3.393	3.782	3.614	3.421	4.029	3.767	3.59	3.48	3.5775	0.225324
Ant. Cranial height (ACH)	5.299	5.03	5.109	5.442	5.208	5.349	5.75	5.719	5.336	5.221	5.3463	0.236777
Middle cranial height (MCH)	5.61	5.922	5.464	5.6	6.069	5.452	5.98	6.163	6.068	5.559	5.7887	0.276916
Post. Cranial height (PCH)	4.986	5.167	5.2	5.243	5.335	4.763	5.568	5.44	5.253	5.154	5.2109	0.224769
Ant. Skull Width (Ant.)	5.947	6.186	5.442	5.605	5.985	6.115	6.165	6.492	6.415	5.823	6.0175	0.331331
Post. Skull width (Post)	9.762	9.326	9.54	9.281	9.968	9.613	9.827	9.903	9.575	9.441	9.6236	0.2371
Frontal bone thickness	0.235	0.1925	0.1645	0.194	0.2695	0.24	0.1735	0.179	0.1375	0.287	0.20725	0.0484202
Parietal bone thickness	0.1695	0.244	0.2085	0.2145	0.172	0.137	0.226	0.173	0.133	0.1775	0.1855	0.0368171
Occiptal bone thickness-side	0.565	0.481	0.473	0.375	0.526	0.52	0.533	0.578	0.485	0.579	0.5115	0.0617634
WT	1	2	3	4	5	6	7	8	9	10
ID:Label (AP measurements)	11355_WTM1	11356_WTM2	11357_WTM3	11458_WTF1	11459_WTF2	11460_WTF3	11456_WTM1	11457_WTM2	11465_LZWTF	11469_LZWTM
skull length (SL)-mm	20.213	20.839	20.326	21.505	21.188	21.635	21.024	21.197	19.28	21.341	20.8548	0.722372
Nasal bone (NB)	7.18	7.479	7.397	7.771	7.436	7.659	7.308	7.455	6.478	7.114	7.3277	0.357734
cranial valult (CV)	13.002	13.369	12.906	13.734	13.719	13.943	13.699	13.759	12.787	14.145	13.5063	0.465194
Ant. Cranial base (ACB)	2.424	2.443	2.885	2.251	2.468	2.581	2.688	2.496	2.872	2.849	2.5957	0.218784
post. Cranial base (PCB)	8.338	8.603	7.811	8.954	9.336	8.848	8.548	9.253	7.516	8.793	8.6	0.583201
Ant facial height (AFH)	3.46	3.536	3.693	3.589	3.412	3.519	3.437	3.373	3.334	3.592	3.4945	0.111548
Ant. Cranial height (ACH)	4.804	5.094	5.481	5.159	5.829	5.41	5.119	5.602	4.932	5.539	5.2969	0.324799
Middle height height (MCH)	5.322	5.58	5.977	5.403	5.94	5.707	5.548	5.931	5.443	5.844	5.6695	0.243543
Post. height height (PCH)	5.142	5.425	5.553	5.314	5.866	5.279	5.013	5.85	5.128	5.204	5.3774	0.296152
Ant. Width (Ant.)	4.941	5.007	5.647	5.241	5.342	5.095	4.946	5.332	4.736	5.088	5.1375	0.259856
Post. Skull width (Post)	9.157	9.406	9.76	9.594	9.579	9.904	9.489	9.497	9.319	9.864	9.5569	0.236969
Fronta bonel thickness	0.4555	0.4705	0.249	0.4985	0.4925	0.5755	0.528	0.524	0.3365	0.506	0.4636	0.09803
Parietal bone thickness	0.171	0.1745	0.263	0.1995	0.182	0.1995	0.189	0.183	0.1525	0.1705	0.18845	0.0297904
Occiptal bone thickness-side	0.459	0.567	0.534	0.575	0.544	0.574	0.596	0.551	0.512	0.445	0.5357	0.0501155

## Sheet: Statistics export from Prism gr
Statistics for KO samples below
ID:Label (AP measurements)	skull length (SL)	Nasal bone (NB)	Cranial vault (CV)	Ant. Cranial base (ACB)	Post. Cranial base PCB)	Anti. Facial height (AFH)	Ant. Cranial height (ACH)	Mid. Cranial height (MCH)	Post. Cranial height (PCH)	Ant. Skull width	Post. Skull width	frontal thickness	Parietal thickness	occipital thickness-side
Number of values	10	10	10	10	10	10	10	10	10	10	10	10	10	10
Minimum	16.95	5.636	11.3	1.976	7.527	3.319	5.03	5.452	4.763	5.442	9.281	0.1375	0.133	0.375
25% Percentile	18	5.698	12.25	2.254	7.834	3.39	5.183	5.535	5.112	5.769	9.412	0.1713	0.1614	0.479
Median	18.41	5.814	12.54	2.393	7.952	3.535	5.318	5.766	5.222	6.05	9.594	0.1933	0.1753	0.523
75% Percentile	19.02	6.139	12.8	2.553	8.265	3.771	5.511	6.068	5.361	6.243	9.846	0.2474	0.2174	0.5683
Maximum	19.5	6.428	13.19	2.624	8.48	4.029	5.75	6.163	5.568	6.492	9.968	0.287	0.244	0.579
Mean	18.42	5.921	12.48	2.385	8.016	3.578	5.346	5.789	5.211	6.018	9.624	0.2073	0.1855	0.5115
Std. Deviation	0.7156	0.2759	0.5072	0.1984	0.2836	0.2253	0.2368	0.2769	0.2248	0.3313	0.2371	0.04842	0.03682	0.06176
Std. Error of Mean	0.2263	0.08725	0.1604	0.06272	0.08969	0.07125	0.07488	0.08757	0.07108	0.1048	0.07498	0.01531	0.01164	0.01953
Lower 95% CI of mean	17.91	5.723	12.11	2.243	7.813	3.416	5.177	5.591	5.05	5.78	9.454	0.1726	0.1592	0.4673
Upper 95% CI of mean	18.93	6.118	12.84	2.527	8.219	3.739	5.516	5.987	5.372	6.255	9.793	0.2419	0.2118	0.5557
Sum	184.2	59.21	124.8	23.85	80.16	35.78	53.46	57.89	52.11	60.18	96.24	2.073	1.855	5.115
Unpaired t test
P value	< 0.0001	< 0.0001	0.0002	0.0365	0.0107	0.3103	0.7021	0.3203	0.1738	< 0.0001	0.5371	< 0.0001	0.8461	0.3487
P value summary	****	****	***	*	*	ns	ns	ns	ns	****	ns	****	ns	ns
Significantly different? (P < 0.05)	Yes	Yes	Yes	Yes	Yes	No	No	No	No	Yes	No	Yes	No	No
One- or two-tailed P value?	Two-tailed	Two-tailed	Two-tailed	Two-tailed	Two-tailed	Two-tailed	Two-tailed	Two-tailed	Two-tailed	Two-tailed	Two-tailed	Two-tailed	Two-tailed	Two-tailed
t, df	t=7.581 df=18	t=9.850 df=18	t=4.738 df=18	t=2.259 df=18	t=2.847 df=18	t=1.044 df=18	t=0.3887 df=18	t=1.022 df=18	t=1.416 df=18	t=6.609 df=18	t=0.6292 df=18	t=7.414 df=18	t=0.1970 df=18	t=0.9621 df=18
How big is the difference?
Mean ± SEM of column A	20.85 ± 0.2284, n=10	7.328 ± 0.1131, n=10	13.51 ± 0.1471, n=10	2.596 ± 0.06919, n=10	8.600 ± 0.1844, n=10	3.495 ± 0.03527, n=10	5.297 ± 0.1027, n=10	5.670 ± 0.07702, n=10	5.377 ± 0.09365, n=10	5.138 ± 0.08217, n=10	9.557 ± 0.07494, n=10	0.4636 ± 0.03100, n=10	0.1885 ± 0.009421, n=10	0.5357 ± 0.01585, n=10
Mean ± SEM of column B	18.42 ± 0.2263, n=10	5.921 ± 0.08725, n=10	12.48 ± 0.1604, n=10	2.385 ± 0.06272, n=10	8.016 ± 0.08969, n=10	3.578 ± 0.07125, n=10	5.346 ± 0.07488, n=10	5.789 ± 0.08757, n=10	5.211 ± 0.07108, n=10	6.018 ± 0.1048, n=10	9.624 ± 0.07498, n=10	0.2073 ± 0.01531, n=10	0.1855 ± 0.01164, n=10	0.5115 ± 0.01953, n=10
Difference between means	-2.437 ± 0.3215	-1.407 ± 0.1429	-1.031 ± 0.2176	-0.2110 ± 0.09339	-0.5838 ± 0.2051	0.08300 ± 0.07951	0.04940 ± 0.1271	0.1192 ± 0.1166	-0.1665 ± 0.1176	0.8800 ± 0.1332	0.06670 ± 0.1060	-0.2564 ± 0.03458	-0.002950 ± 0.01498	-0.0242 ± 0.02515
95% confidence interval	-3.113 to -1.762	-1.707 to -1.107	-1.489 to -0.5740	-0.4072 to -0.01480	-1.015 to -0.1529	-0.08404 to 0.2500	-0.2176 to 0.3164	-0.1258 to 0.3642	-0.4135 to 0.08051	0.6002 to 1.160	-0.1560 to 0.2894	-0.3290 to -0.1837	-0.03441 to 0.02851	-0.07704 to 0.02864
R squared	0.7615	0.8435	0.555	0.2209	0.3104	0.05709	0.008322	0.05486	0.1003	0.7082	0.02152	0.7533	0.002151	0.04891
WT	20.85	7.328	13.51	2.596	8.6	3.495	5.297	5.67	5.377	5.138	9.557	0.4636	0.1885	0.5357
KO	18.42	5.921	12.48	2.385	8.016	3.578	5.346	5.789	5.211	6.018	9.624	0.2073	0.1855	0.5115
	88.3453	80.7997	92.376	91.8721	93.2093	102.375	100.925	102.099	96.9128	117.127	100.701	44.7153	98.4085	95.4825
% diff	11.6547	19.2003	7.62398	8.12789	6.7907	-2.37482	-0.925052	-2.09877	3.08722	-17.1273	-0.701057	55.2847	1.59151	4.51745
Statistics for WT samples below
ID:Label (AP measurements)	skull length (SL)	Nasal bone (NB)	Cranial vault (CV)	Ant. Cranial base (ACB)	Post. Cranial base PCB)	Anti. Facial height (AFH)	Ant. Cranial height (ACH)	Mid. Cranial height (MCH)	Post. Cranial height (PCH)	Ant. Skull width	Post. Skull width	frontal thickness	Parietal thickness	occipital thickness-side
Number of values	10	10	10	10	10	10	10	10	10	10	10	10	10	10
Minimum	19.28	6.478	12.79	2.251	7.516	3.334	4.804	5.322	5.013	4.736	9.157	0.249	0.1525	0.445
25% Percentile	20.3	7.164	12.98	2.438	8.206	3.402	5.054	5.433	5.139	4.945	9.384	0.4258	0.1709	0.4988
Median	21.11	7.417	13.71	2.539	8.698	3.49	5.285	5.644	5.297	5.092	9.538	0.4955	0.1825	0.5475
75% Percentile	21.38	7.524	13.81	2.855	9.029	3.59	5.555	5.933	5.627	5.335	9.786	0.525	0.1995	0.5743
Maximum	21.64	7.771	14.15	2.885	9.336	3.693	5.829	5.977	5.866	5.647	9.904	0.5755	0.263	0.596
Mean	20.85	7.328	13.51	2.596	8.6	3.495	5.297	5.67	5.377	5.138	9.557	0.4636	0.1885	0.5357
Std. Deviation	0.7224	0.3577	0.4652	0.2188	0.5832	0.1115	0.3248	0.2435	0.2962	0.2599	0.237	0.09803	0.02979	0.05012
Std. Error of Mean	0.2284	0.1131	0.1471	0.06919	0.1844	0.03527	0.1027	0.07702	0.09365	0.08217	0.07494	0.031	0.009421	0.01585
Lower 95% CI of mean	20.34	7.072	13.17	2.439	8.183	3.415	5.065	5.495	5.166	4.952	9.387	0.3935	0.1671	0.4998
Upper 95% CI of mean	21.37	7.584	13.84	2.752	9.017	3.574	5.529	5.844	5.589	5.323	9.726	0.5337	0.2098	0.5716
Sum	208.5	73.28	135.1	25.96	86	34.95	52.97	56.7	53.77	51.38	95.57	4.636	1.885	5.357
