# Supplementary material for: Control of craniofacial development by the collagen receptor, discoidin domain receptor 2
Source: eLife journal article supplement (doi:10.7554/elife.77257), 2023-01-19
Supplement: supp [file elife-77257-supp-v1.zip › elife_poa_e77257_Figure_2_figure_supplement_1.pdf]

## Figure 2-Figure Supplement 1

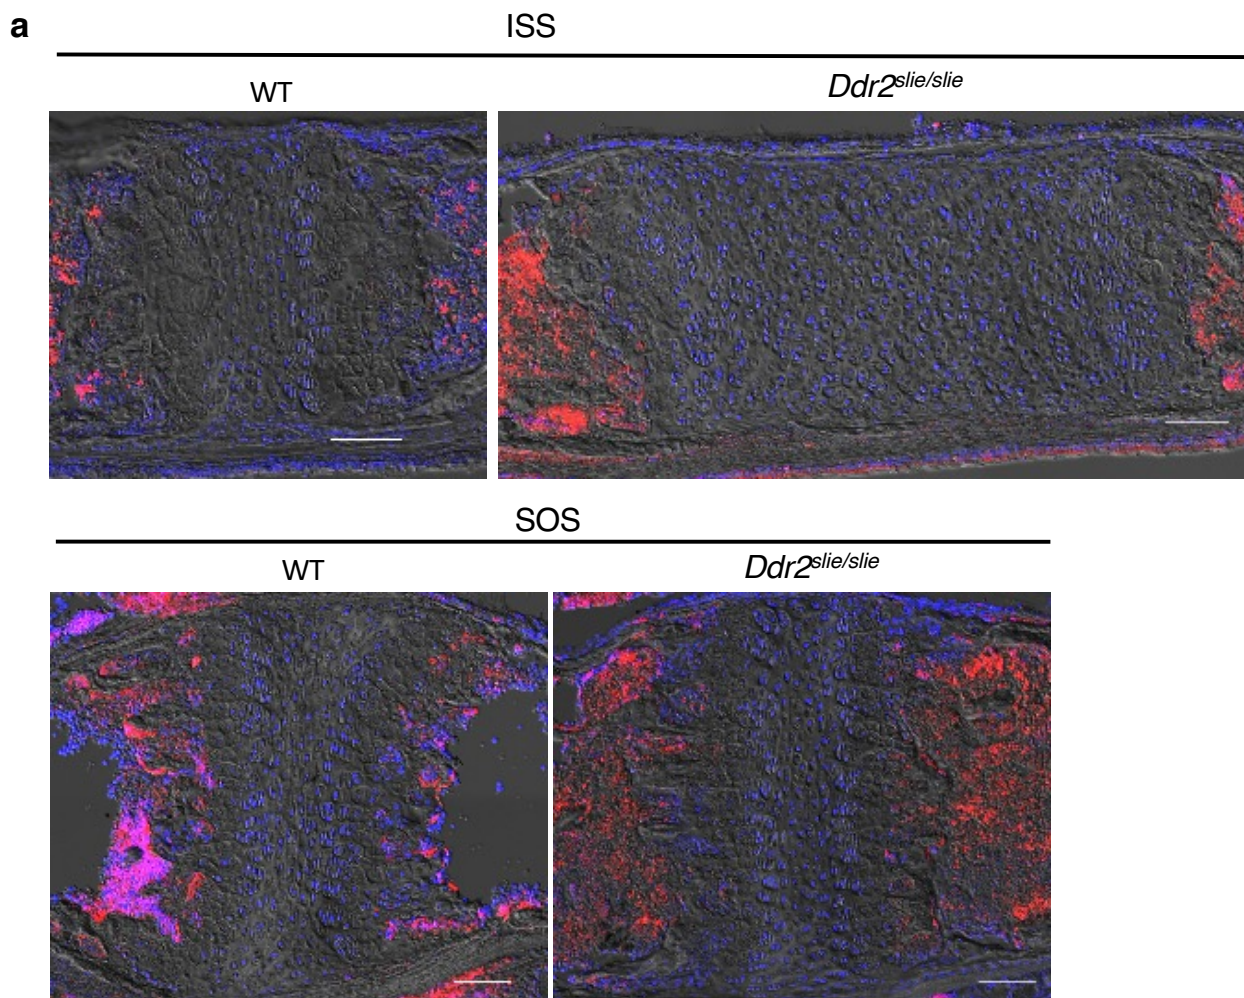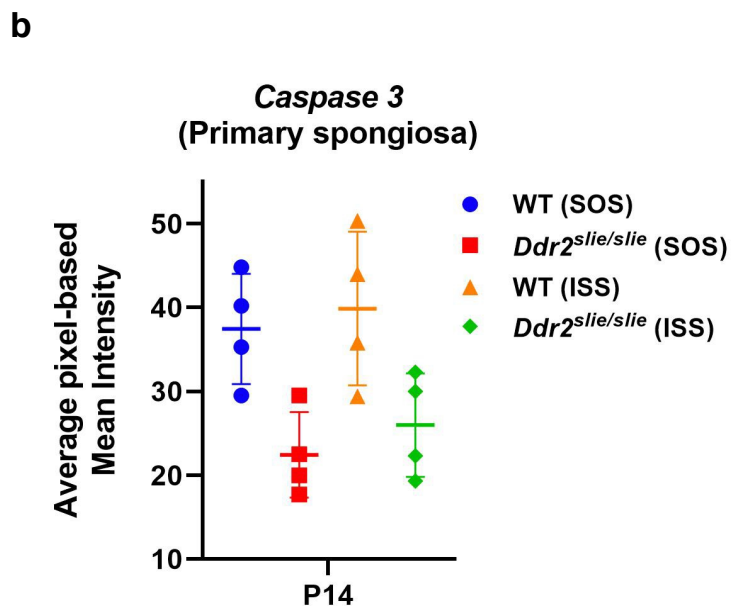

**Figure 2-figure supplement 1. No change in levels of cleaved caspase 3 levels in wild-type versus *Ddr2<sup>slie/slie</sup>* mice. a,** Localization of cleaved caspase 3 in ISS and SOS in 2 week-old mice using immunofluorescence. **b,** quantitation of IF staining. Scale bar, 100  $\mu$ m
