# Supplementary material for: Control of craniofacial development by the collagen receptor, discoidin domain receptor 2
Source: eLife journal article supplement (doi:10.7554/elife.77257), 2023-01-19
Supplement: supp [file elife-77257-supp-v1.zip › elife_poa_e77257_Figure_2_source_data_1.xlsx]

## Sheet: Cranial base linea measurements
Skull linear measurments-Global-Ddr2 Slie vs WT -- 3months
KO	1	2	3	4	5	6	7	8	9	10
ID:Label (AP measurements)	11352_KOM1	11353_KOM2	11354_KOM3	11448_KOF1	11449_KOF2	11450_KOF3	11492_KOF4	11452_KOM1	11453_KOM2	11455_KOM3	Average	SD
Presphenoid (PS)	2.228	2.211	2.158	2.068	2.221	2.189	2.127	2.162	2.08	2.253	2.1697	0.059545
Basiosphenoid (BS)	3.014	2.7	2.924	2.741	2.603	2.859	2.771	2.938	2.652	2.888	2.809	0.128711
Basiooccipital (BO)	3.222	3.106	3.253	2.956	3.05	2.793	2.933	3.086	2.715	2.777	2.9891	0.177049
ISS width	0.309	0.218	0.391	0.481	0.298	0.415	0.338	0.306	0.332	0.374	0.3462	0.0690736
SOS width	0.154	0.13	0.151	0.186	0.135	0.197	0.134	0.175	0.222	0.15	0.1634	0.029011
ISS height	0.429	0.793	0.513	0.434	0.652	0.335	0.655	0.481	0.687	0.373	0.5352	0.144512
SOS height	0.677	0.623	0.735	0.656	0.638	0.686	0.739	0.737	0.703	0.709	0.6903	0.0396208
WT	1	2	3	4	5	6	7	8	9	10
ID:Label (AP measurements)	11355_WTM1	11356_WTM2	11357_WTM3	11458_WTF1	11459_WTF2	11460_WTF3	11456_WTM1	11457_WTM2	11465_LZWTF	11469_LZWTM
Presphenoid (PS)	2.054	2.323	1.443	2.201	2.419	2.128	2.044	2.382	1.512	2.239	2.0745	0.322097
Basiosphenoid (BS)	3.196	3.267	3.008	3.516	3.426	3.385	3.348	3.419	2.872	3.343	3.278	0.190679
Basiooccipital (BO)	3.027	2.968	3.315	3.121	3.41	3.234	3.123	3.403	3.101	3.178	3.188	0.142989
ISS width	0.073	0.094	0.071	0.177	0.119	0.154	0.163	0.095	0.118	0.141	0.1205	0.0355084
SOS width	0.116	0.102	0.127	0.164	0.107	0.151	0.141	0.118	0.171	0.137	0.1334	0.0223482
ISS height	0.425	0.425	0.419	0.429	0.449	0.479	0.428	0.429	0.458	0.413	0.4354	0.0192883
SOS height	0.53	0.567	0.622	0.856	0.557	0.643	0.575	0.606	0.623	0.576	0.6155	0.0866432

## Sheet: Statistics export from Prism gr
Statistics for KO samples below
ID:Label (AP measurements)	Presphenoid (PS)	basiosphenoid (BS)	basio-occipital (BO)	ISS width	SOS width	ISS height	SOS height
Number of values	10	10	10	10	10	10	10
Minimum	2.068	2.603	2.715	0.218	0.13	0.335	0.623
25% Percentile	2.115	2.688	2.789	0.304	0.1348	0.415	0.6515
Median	2.176	2.815	3.003	0.335	0.1525	0.497	0.6945
75% Percentile	2.223	2.928	3.135	0.397	0.1888	0.663	0.7355
Maximum	2.253	3.014	3.253	0.481	0.222	0.793	0.739
Mean	2.17	2.809	2.989	0.3462	0.1634	0.5352	0.6903
Std. Deviation	0.06277	0.1357	0.1866	0.07281	0.03058	0.1523	0.04176
Std. Error of Mean	0.01985	0.0429	0.05902	0.02302	0.00967	0.04817	0.01321
Lower 95% CI of mean	2.125	2.712	2.856	0.2941	0.1415	0.4262	0.6604
Upper 95% CI of mean	2.215	2.906	3.123	0.3983	0.1853	0.6442	0.7202
Sum	21.7	28.09	29.89	3.462	1.634	5.352	6.903
Unpaired t test
P value	0.3947	< 0.0001	0.0173	< 0.0001	0.0244	0.0548	0.0301
P value summary	ns	****	*	****	*	ns	*
Significantly different? (P < 0.05)	No	Yes	Yes	Yes	Yes	No	Yes
One- or two-tailed P value?	Two-tailed	Two-tailed	Two-tailed	Two-tailed	Two-tailed	Two-tailed	Two-tailed
t, df	t=0.8719 df=18	t=6.116 df=18	t=2.622 df=18	t=8.718 df=18	t=2.458 df=18	t=2.054 df=18	t=2.355 df=18
How big is the difference?
Mean ± SEM of column A	2.075 ± 0.1074, n=10	3.278 ± 0.06356, n=10	3.188 ± 0.04766, n=10	0.1205 ± 0.01184, n=10	0.1334 ± 0.007449, n=10	0.4354 ± 0.006429, n=10	0.6155 ± 0.02888, n=10
Mean ± SEM of column B	2.170 ± 0.01985, n=10	2.809 ± 0.04290, n=10	2.989 ± 0.05902, n=10	0.3462 ± 0.02302, n=10	0.1634 ± 0.009670, n=10	0.5352 ± 0.04817, n=10	0.6903 ± 0.01321, n=10
Difference between means	0.09520 ± 0.1092	-0.4690 ± 0.07668	-0.1989 ± 0.07586	0.2257 ± 0.02589	0.0300 ± 0.01221	0.09980 ± 0.04860	0.07480 ± 0.03176
95% confidence interval	-0.1342 to 0.3246	-0.6301 to -0.3079	-0.3583 to -0.03952	0.1713 to 0.2801	0.004354 to 0.05565	-0.002300 to 0.2019	0.008080 to 0.1415
R squared	0.04052	0.6751	0.2764	0.8085	0.2512	0.1898	0.2356
WT	2.075	3.278	3.188	0.1205	0.1334	0.4354	0.6155
KO	2.17	2.809	2.989	0.3462	0.1634	0.5352	0.6903
	104.578	85.6925	93.7578	287.303	122.489	122.921	112.153
% diff	-4.57831	14.3075	6.24216	-187.303	-22.4888	-22.9215	-12.1527
Statistics for WT samples below
ID:Label (AP measurements)	Presphenoid	basiosphenoid	basio-occipital	ISS width	SOS width	ISS height	SOS height
Number of values	10	10	10	10	10	10	10
Minimum	1.443	2.872	2.968	0.071	0.102	0.413	0.53
25% Percentile	1.911	3.149	3.083	0.08875	0.1138	0.4235	0.5645
Median	2.165	3.346	3.151	0.1185	0.132	0.4285	0.591
75% Percentile	2.338	3.421	3.337	0.1563	0.1543	0.4513	0.628
Maximum	2.419	3.516	3.41	0.177	0.171	0.479	0.856
Mean	2.075	3.278	3.188	0.1205	0.1334	0.4354	0.6155
Std. Deviation	0.3395	0.201	0.1507	0.03743	0.02356	0.02033	0.09133
Std. Error of Mean	0.1074	0.06356	0.04766	0.01184	0.007449	0.006429	0.02888
Lower 95% CI of mean	1.832	3.134	3.08	0.09372	0.1165	0.4209	0.5502
Upper 95% CI of mean	2.317	3.422	3.296	0.1473	0.1503	0.4499	0.6808
Sum	20.75	32.78	31.88	1.205	1.334	4.354	6.155
