# Supplementary material for: Control of craniofacial development by the collagen receptor, discoidin domain receptor 2
Source: eLife journal article supplement (doi:10.7554/elife.77257), 2023-01-19
Supplement: supp [file elife-77257-supp-v1.zip › elife_poa_e77257_Figure_2_source_data_2.xlsx]

## Sheet: Proliferation analysis
	Proliferation 2 week cranial base
	2weeks
	WT
		ISS			SOS
	Sample ID-Slide no	Positive cells/ Total cells	% EdU+cells	AvG	Positive cells/ Total cells	% EdU+cells	AvG
	WTF5_33	0.0666667	6.66667		0.0764873	7.64873
		0.0784314	7.84314		0.0779221	7.79221
		0.0580205	5.80205	6.77062	0.0698925	6.98925	7.47673
	WTF5_37	0.0774648	7.74648		0.0592593	5.92593
		0.0526316	5.26316		0.106583	10.6583
		0.0483871	4.83871	5.94945	0.0737463	7.37463	7.98629
	WTF5_37	0.0722433	7.22433		0.0656566	6.56566
		0.05	5	6.11217	0.0830325	8.30325	7.43445
	WTF6_21	0.0686695	6.86695		0.0958084	9.58084
		0.0766667	7.66667	7.26681	0.0901639	9.01639	9.29862
	WTF6_39	0.0481481	4.81481		0.0635838	6.35838
		0.0706714	7.06714		0.097561	9.7561
		0.0712074	7.12074	6.33423	0.0879121	8.79121	8.3019
	WTF6_43	0.0553936	5.53936		0.0796703	7.96703
		0.047486	4.7486	5.14398	0.105085	10.5085	9.23775
	WT	0.0840336	8.40336		0.0760234	7.60234
		0.0421941	4.21941		0.0594059	5.94059
		0.0553846	5.53846		0.0851735	8.51735
		0.0483384	4.83384	5.74877	0.106464	10.6464	8.17667
	Ave			6.18943			8.2732
	SD			0.691641			0.754119
	Ddr2-Slie KO
		ISS			SOS
	Sample ID-Slide no	Positive cells/ Total cells	% EdU+cells	AvG	Positive cells/ Total cells	% EdU+cells	AvG
	HF4_41	0.0188679	1.88679		0.062201	6.2201
		0.0209924	2.09924		0.0649718	6.49718
		0.0160321	1.60321	1.86308	0.0575758	5.75758	6.15828
	HF4_44	0.0325497	3.25497		0.0676471	6.76471
		0.0361446	3.61446		0.0686016	6.86016
		0.0418944	4.18944	3.68629	0.055409	5.5409	6.38859
	HF4_42	0.0307971	3.07971		0.0620155	6.20155
		0.0247148	2.47148		0.064	6.4
		0.0303688	3.03688	2.86269	0.059126	5.9126	6.17138
	KOM2	0.0280778	2.80778		0.0643016	6.43016
		0.0326409	3.26409	3.03594	0.0453461	4.53461	5.48238
	KO-16	0.0428571	4.28571		0.062201	6.2201	6.2201
		0.0217391	2.17391	3.22981
	Ave			2.93556			6.08415
	SD			0.673755			0.34871

## Sheet: TUNEL analysis
TUNEL 2 week cranial base
		POSITIVE CELLS/FIELD
Sample/slide no.		WT ISS	WT SOS
W1		4	5
W2		3	5
W3		2	4
W4		2	4
W5		3	4
	MEAN	2.8	4.4
	SD	0.83666	0.547723
		DDR2SLIE/SLIE ISS	DDR2SLIE/SLIE SOS
D1		3	3
D2		2	4
D3		2	4
D4		3	4
D5		3	2
	MEAN	2.6	3.4
	SD	0.547723	0.894427
