# Supplementary material for: Control of craniofacial development by the collagen receptor, discoidin domain receptor 2
Source: eLife journal article supplement (doi:10.7554/elife.77257), 2023-01-19
Supplement: supp [file elife-77257-supp-v1.zip › elife_poa_e77257_Figure_3_digure_supplement_2.pdf]

Figure 3-Figure Supplement 2

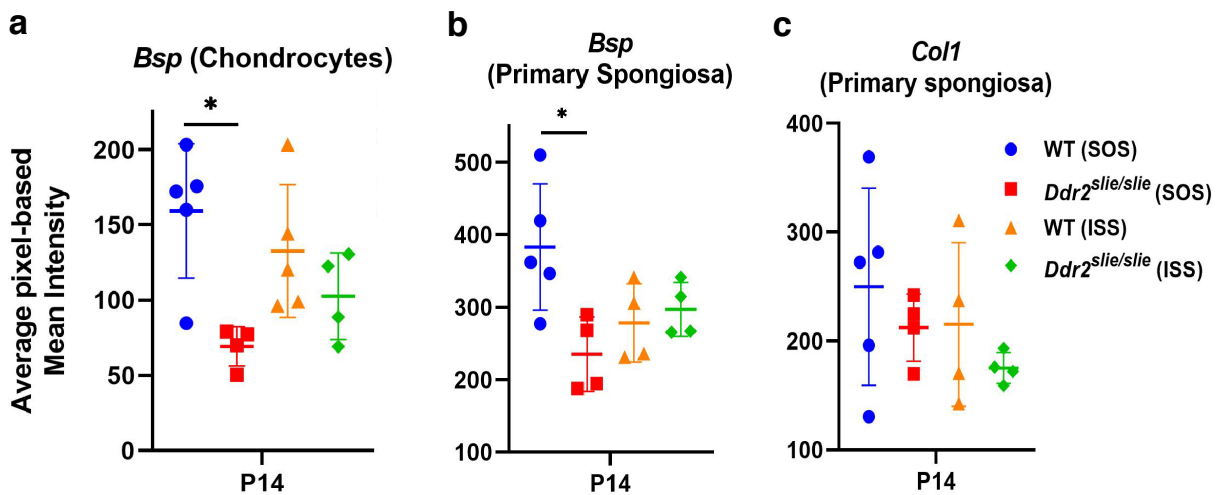

**Figure 3-figure supplement 2. Quantitation of Ibsp (Bsp) and Col I immunofluorescence in WT and *Ddr2<sup>slie/slie</sup>* mice.** **a**, Ibsp in hypertrophic chondrocyte layers. **b**, Ibsp in primary spongiosa. Note: Ibsp is significantly lower only in the SOS. **c**, No change in Col I in the primary spongiosa.
