# Supplementary material for: Control of craniofacial development by the collagen receptor, discoidin domain receptor 2
Source: eLife journal article supplement (doi:10.7554/elife.77257), 2023-01-19
Supplement: supp [file elife-77257-supp-v1.zip › elife_poa_e77257_Figure_3_figure_supplement_1.pdf]

Figure 3-Figure Supplement 1

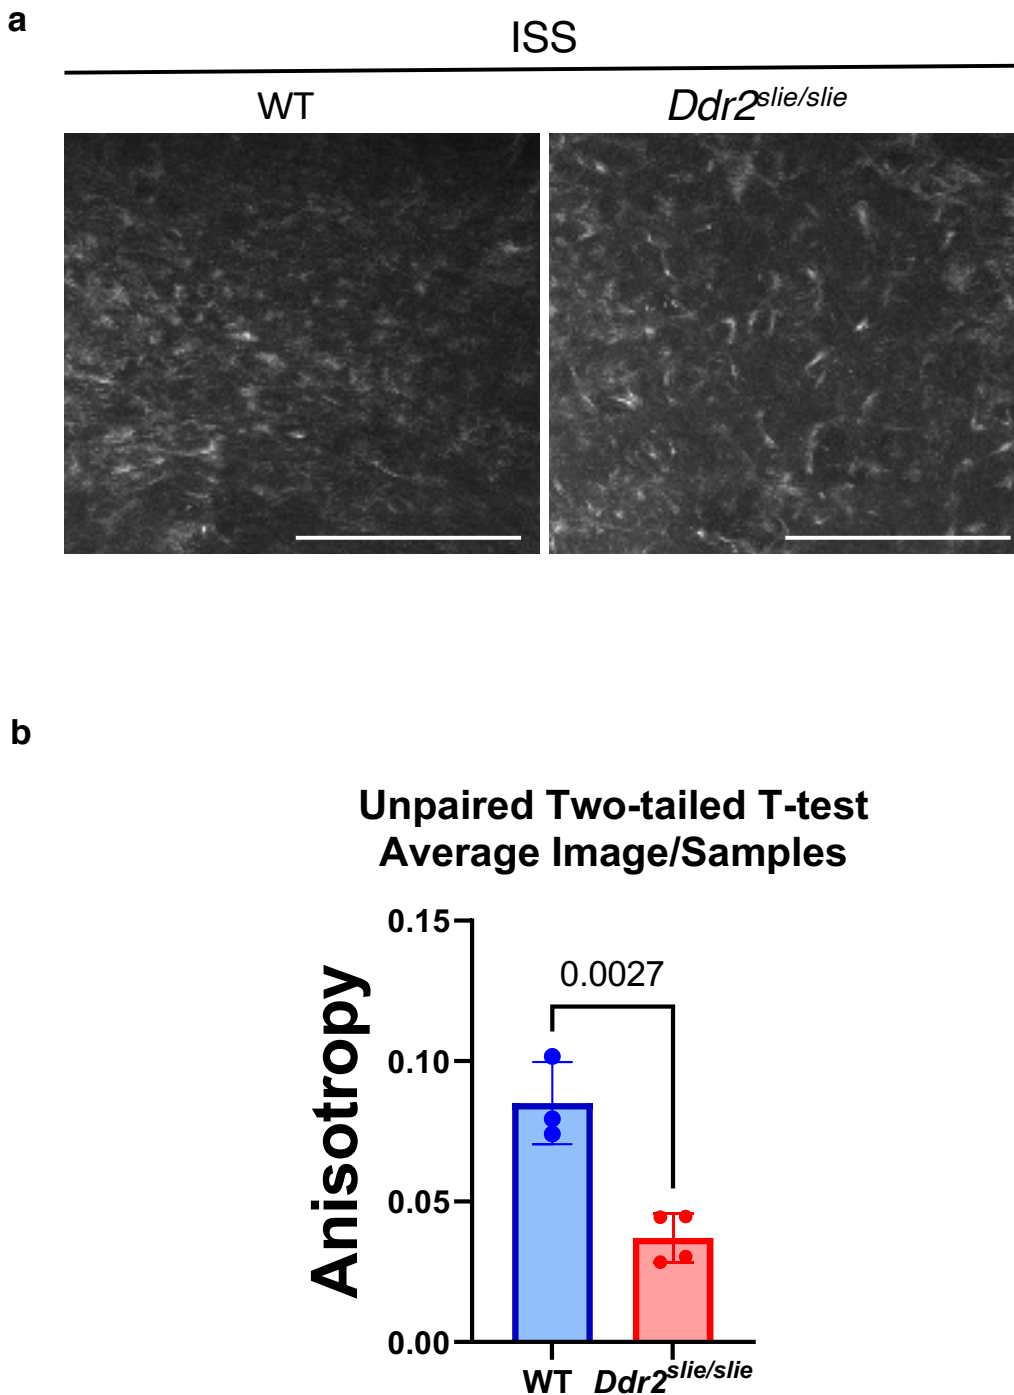

**Figure 3-figure supplement 1. *Ddr2* deficiency is associated with loss of collagen organization in the ISS of *Ddr2*<sup>slie/slie</sup> mice.** **a**, Second harmonic generation imaging of fibrillar collagen in the ISS resting zone of 2 week-old WT versus *Ddr2*<sup>slie/slie</sup> mice. Scale bar, 100  $\mu$ m **b**, anisotropy was measured using ImageJ FibrilTool as described in Methods. For each sample, 3 or 4 ROIs were selected within the central ISS resting zone for analysis and averaged (n=3 or 4/group). Bars are mean  $\pm$  SEM.
