# Supplementary material for: Control of craniofacial development by the collagen receptor, discoidin domain receptor 2
Source: eLife journal article supplement (doi:10.7554/elife.77257), 2023-01-19
Supplement: supp [file elife-77257-supp-v1.zip › elife_poa_e77257_Figure_5_figure_supplement_1.pdf]

**Figure 5-Figure Supplement 1.**

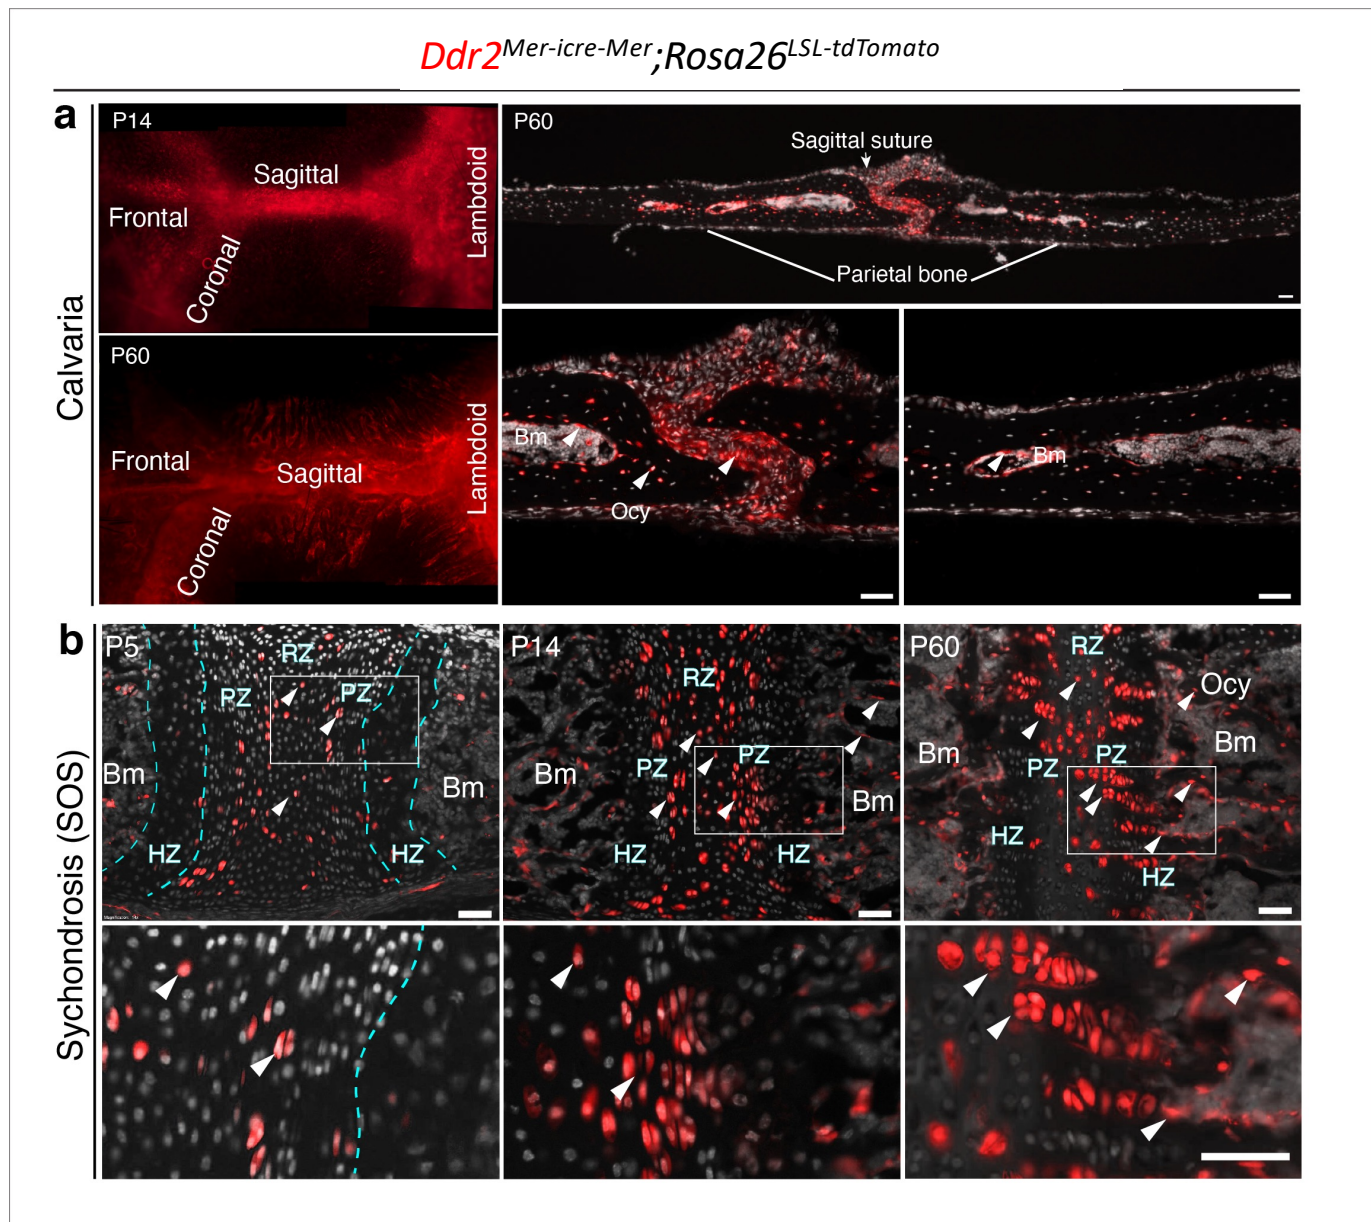

**Figure 5-figure supplement 1. *Ddr2<sup>Mer-icre-Mer</sup>* induced recombination in cranial sutures and cranial base synchondrosis.** Neonatal *Ddr2<sup>Mer-icre-Mer</sup>;Rosa26<sup>LSL-tdTomato</sup>* mice were treated with tamoxifen as described in Fig. 5. **a**, Whole mounts (left) at P14 and P60 show *Ddr2 tdTomato* labeling in all cranial sutures: frontal, sagittal, coronal and lambdoid sutures (left). Cryosections (right) show distribution of *tdTomato*-labelled cells at P60 in the suture mesenchyme, bone marrow lining cells and osteocytes. Scale bar: 50µm. **b**, Cryostat sections of the cranial base sphenoid-occipital synchondrosis (SOS) shows *tdTomato* labeling initially in resting and proliferative chondrocyte zones (P5). At later times (P14, P60), progeny of *Ddr2*-positive cells form single or two column clones along the axis of cranial base growth extending into the hypertrophic zone and osteocytes. Scale bar: 50µm.
