# Supplementary material for: Control of craniofacial development by the collagen receptor, discoidin domain receptor 2
Source: eLife journal article supplement (doi:10.7554/elife.77257), 2023-01-19
Supplement: supp [file elife-77257-supp-v1.zip › elife_poa_e77257_Figure_5_figure_supplement_2.pdf]

Figure 5-Figure Supplement 2

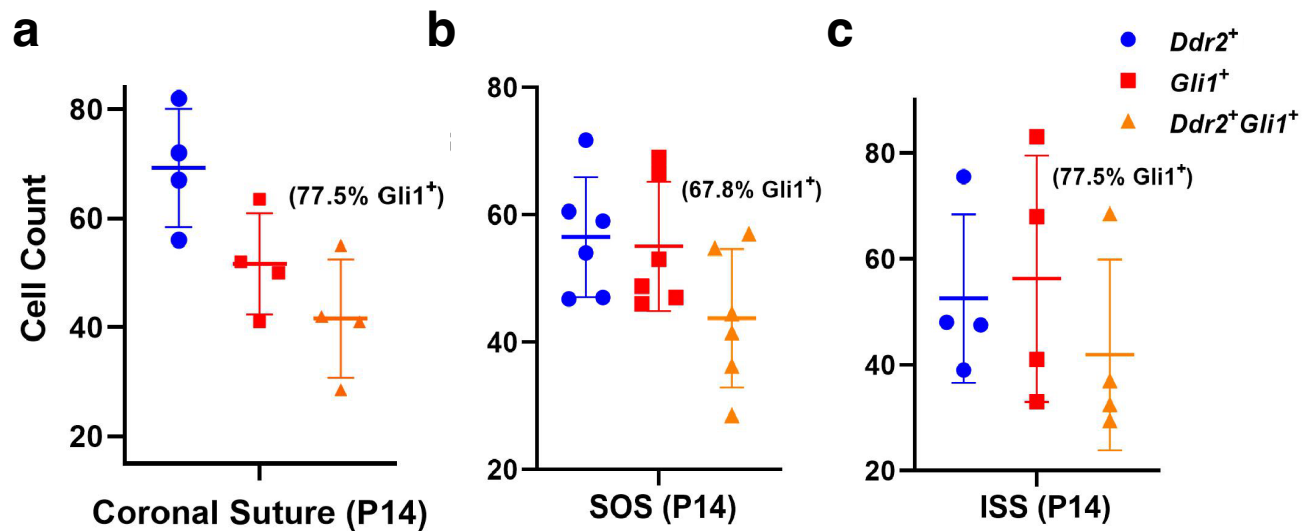

**Figure 5-figure supplement 2. Co-localization of DDR2 and GLI1 in cranial suture and synchondroses in 2-week-old mice. a, coronal suture b, SOS. c, ISS. Colocalization is expressed as the percentage of *GLI1*<sup>+</sup> cells that are also *DDR2*<sup>+</sup>**
