# Supplementary material for: Control of craniofacial development by the collagen receptor, discoidin domain receptor 2
Source: eLife journal article supplement (doi:10.7554/elife.77257), 2023-01-19
Supplement: supp [file elife-77257-supp-v1.zip › elife_poa_e77257_Figure_6_source_data_1.xlsx]

## Sheet: Skull Linear measurments
Skull linear measurments -- Gli1-CreERT;Ddr2flox--- 3months
Gli1-CreERT;Ddr2fl/fl --(cKO)
CKO	1	2	3	4	5	6	7	8	9	10
ID:Label (AP measurements)	13318_414F2	13335_791F4	13336_823F0	13342_823M2	13344_823M4	13345_823M6	13346_823M7	13347_823M2	13348_840F2	13340_823F5
skull length (SL)-mm	17.768	18.715	16.574	17.589	18.298	17.528	17.718	16.91	17.753	16.742
Nasal bone (NB)	5.655	6.045	5.063	5.567	5.88	5.529	5.391	5.227	5.634	5.228
cranial valult (CV)	12.083	12.654	11.495	11.975	12.368	11.983	12.311	11.621	12.093	11.498
Ant. Cranial base (ACB)	2.517	2.589	2.393	2.526	2.907	2.597	2.696	2.442	2.492	2.843
post. Cranial base (PCB)	7.08	7.894	6.792	7.485	6.57	7.011	7.409	7.125	7.364	6.634
Presphenoid (PS)	1.88	1.994	1.826	2.012	1.938	1.753	1.892	2.007	2.015	1.5
Basiosphenoid (BS)	2.592	2.862	2.338	2.651	2.365	2.486	2.743	2.505	2.682	2.432
Basiooccipital (BO)	2.577	2.974	2.587	2.744	2.234	2.693	2.727	2.629	2.619	2.638
ISS width	0.164	0.21	0.147	0.168	0.111	0.18	0.229	0.29	0.281	0.112
SOS width	0.178	0.149	0.184	0.168	0.181	0.169	0.18	0.189	0.252	0.17
ISS height	0.489	0.376	0.478	0.291	0.476	0.657	0.392	0.29	0.309	0.515
SOS height	0.557	0.655	0.577	0.581	1.013	0.721	0.683	0.594	0.579	0.555
Ant facial height (AFH)	3.369	3.403	3.554	3.553	3.795	3.393	3.742	3.359	3.631	3.551
Ant. Cranial height (ACH)	4.7	5.196	5.244	5.347	5.356	4.885	5.291	5.271	5.377	5.319
Middle cranial height (MCH)	5.141	5.376	5.507	5.378	4.958	5.308	5.211	5.154	5.46	5.441
Post. Cranial height (PCH)	4.781	4.945	4.735	4.546	4.85	4.843	4.567	4.355	4.554	4.305
Ant. Skull Width (Ant.)	5.382	5.981	5.504	5.598	6.406	5.593	5.832	5.787	5.848	6.16
Post. Skull width (Post)	9.005	9.47	9.062	8.872	9.872	9.226	9.032	8.914	9.242	9.113
Frontal bone thickness	0.1135	0.107	0.119	0.119	0.1125	0.1125	0.121	0.1015	0.095	0.108
Parietal bone thickness	0.1785	0.16	0.171	0.1755	0.184	0.184	0.1805	0.196	0.2	0.178
Occiptal bone thickness-side	0.55	0.506	0.532	0.522	0.569	0.49	0.386	0.474	0.548	0.384
Ddr2fl/fl ---(CTR)
CTR	1	2	3	4	5	6	7	8	9	10
ID:Label (AP measurements)	13319_497F5	13320_779M5	13334_791F2	13337_823F1	13338_823F3	13339_823F4	13341_823M1	13343_823M3	13349_843M4	13350_853M2
skull length (SL)-mm	19.11	20.288	19.551	19.207	19.81	19.979	19.279	19.454	20.228	19.58
Nasal bone (NB)	6.75	6.9	6.716	6.299	6.668	6.638	6.421	6.574	6.764	6.342
cranial valult (CV)	12.329	13.34	12.803	12.875	13.109	13.292	12.873	12.833	13.464	13.238
Ant. Cranial base (ACB)	1.834	2.712	2.076	2.684	2.358	2.84	2.71	2.73	2.56	2.813
post. Cranial base (PCB)	7.998	8.359	8.352	7.995	8.295	8.206	8.053	7.891	8.581	8.164
Presphenoid (PS)	2.265	2.078	2.328	2.113	2.31	2.147	2.017	1.945	2.244	2.098
Basiosphenoid (BS)	2.913	3.172	3.114	2.976	2.879	3.055	3.003	2.934	3.161	2.846
Basiooccipital (BO)	2.774	3.061	2.831	2.85	3.058	2.939	3.003	2.918	3.082	3.171
ISS width	0.057	0.139	0.157	0.08	0.1	0.107	0.116	0.097	0.098	0.106
SOS width	0.147	0.173	0.194	0.171	0.133	0.175	0.159	0.172	0.137	0.165
ISS height	0.384	0.41	0.339	0.312	0.354	0.362	0.394	0.383	0.375	0.298
SOS height	0.478	0.584	0.531	0.443	0.539	0.578	0.457	0.498	0.525	0.531
Ant facial height (AFH)	3.382	3.469	3.414	3.333	3.648	3.579	3.326	3.594	3.378	3.573
Ant. Cranial height (ACH)	4.864	5.046	5.036	4.838	5.244	5.524	4.897	5.029	4.949	5.375
Middle cranial height (MCH)	5.26	5.269	5.175	5.197	5.372	5.462	5.238	5.235	5.279	5.349
Post. Cranial height (PCH)	4.828	5.009	4.702	4.741	5.004	4.962	4.943	5.056	4.98	4.834
Ant. Skull Width (Ant.)	5.117	4.87	4.86	4.705	5.14	4.97	4.666	4.628	4.741	5.106
Post. Skull width (Post)	9.123	9.343	9.044	8.975	9.466	9.511	8.9	8.88	9.245	9.367
Frontal bone thickness	0.1725	0.3615	0.1975	0.167	0.175	0.1705	0.2155	0.233	0.511	0.141
Parietal bone thickness	0.1685	0.1865	0.1925	0.174	0.159	0.1955	0.167	0.1745	0.1985	0.2005
Occiptal bone thickness-side	0.516	0.527	0.498	0.541	0.504	0.537	0.477	0.497	0.516	0.474

## Sheet: Statistics export from Prism gr
Statistics for cKO samples below
ID:Label (AP measurements)	skull length (SL)	Nasal bone (NB)	Cranial vault (CV)	Ant. Cranial base (ACB)	Post. Cranial base PCB)	Presphenoid	basiosphenoid	basio-occipital	ISS width	SOS width	ISS height	SOS height	Ant facial height (AFH)	Ant. Cranial height (ACH)	Middle cranial height (MCH)	Post. Cranial height (PCH)	Ant. Width (Ant.)	Post. Skull width (Post)	frontal thickness	Parietal thickness	occipital thickness-side	Ant. Width/skull length	Post. Skull width/skull length	Ant facial height (AFH)	Ant. Cranial height (ACH)	Middle cranial height (MCH)	Post. Cranial height (PCH)
Number of values	10	10	10	10	10	10	10	10	10	10	10	10	10	10	10	10	10	10	10	10	10	10	10	10	10	10	10
Minimum	16.57	5.063	11.5	2.393	6.57	1.5	2.338	2.234	0.111	0.149	0.29	0.555	3.359	4.7	4.958	4.305	5.382	8.872	0.095	0.16	0.384
25% Percentile	16.87	5.228	11.59	2.48	6.753	1.808	2.415	2.585	0.1383	0.1688	0.3045	0.572	3.387	5.118	5.151	4.498	5.571	8.982	0.1056	0.1744	0.452
Median	17.65	5.548	12.03	2.558	7.103	1.915	2.549	2.634	0.174	0.179	0.434	0.5875	3.552	5.281	5.342	4.651	5.81	9.088	0.1125	0.1795	0.514
75% Percentile	17.9	5.711	12.33	2.733	7.428	2.008	2.697	2.731	0.242	0.1853	0.4955	0.6925	3.659	5.349	5.446	4.845	6.026	9.299	0.119	0.187	0.5485
Maximum	18.72	6.045	12.65	2.907	7.894	2.015	2.862	2.974	0.29	0.252	0.657	1.013	3.795	5.377	5.507	4.945	6.406	9.872	0.121	0.2	0.569
Mean	17.56	5.522	12.01	2.6	7.136	1.882	2.566	2.642	0.1892	0.182	0.4273	0.6515	3.535	5.199	5.293	4.648	5.809	9.181	0.1109	0.1808	0.4961
Std. Deviation	0.6708	0.3046	0.3839	0.1682	0.4126	0.1605	0.1702	0.1841	0.06292	0.02702	0.1176	0.139	0.1552	0.2251	0.1736	0.2164	0.3124	0.2992	0.008232	0.0115	0.06514	0	0
Std. Error of Mean	0.2121	0.09634	0.1214	0.05318	0.1305	0.05074	0.05383	0.0582	0.0199	0.008545	0.03719	0.04395	0.04907	0.07117	0.0549	0.06844	0.09878	0.0946	0.002603	0.003636	0.0206	0	0
Lower 95% CI of mean	17.08	5.304	11.73	2.48	6.841	1.767	2.444	2.511	0.1442	0.1627	0.3432	0.5521	3.424	5.038	5.169	4.493	5.586	8.967	0.105	0.1725	0.4495
Upper 95% CI of mean	18.04	5.74	12.28	2.72	7.432	1.996	2.687	2.774	0.2342	0.2013	0.5114	0.7509	3.646	5.36	5.418	4.803	6.033	9.395	0.1168	0.189	0.5427
Sum	175.6	55.22	120.1	26	71.36	18.82	25.66	26.42	1.892	1.82	4.273	6.515	35.35	51.99	52.93	46.48	58.09	91.81	1.109	1.808	4.961
Unpaired t test
P value	< 0.0001	< 0.0001	< 0.0001	0.5729	< 0.0001	0.0005	< 0.0001	0.0002	0.0012	0.079	0.1059	0.0093	0.3049	0.259	0.875	0.0041	< 0.0001	0.9698	0.0033	0.8812	0.5712	<0.0001	<0.0001
P value summary	****	****	****	ns	****	***	****	***	**	ns	ns	**	ns	ns	ns	**	****	ns	**	ns	ns	****	****
Significantly different? (P < 0.05)	Yes	Yes	Yes	No	Yes	Yes	Yes	Yes	Yes	No	No	Yes	No	No	No	Yes	Yes	No	Yes	No	No	Yes	Yes
One- or two-tailed P value?	Two-tailed	Two-tailed	Two-tailed	Two-tailed	Two-tailed	Two-tailed	Two-tailed	Two-tailed	Two-tailed	Two-tailed	Two-tailed	Two-tailed	Two-tailed	Two-tailed	Two-tailed	Two-tailed	Two-tailed	Two-tailed	Two-tailed	Two-tailed	Two-tailed	Two-tailed	Two-tailed
t, df	t=8.373 df=18	t=9.464 df=18	t=6.225 df=18	t=0.5742 df=18	t=7.181 df=18	t=4.199 df=18	t=6.741 df=18	t=4.614 df=18	t=3.834 df=18	t=1.862 df=18	t=1.702 df=18	t=2.910 df=18	t=1.056 df=18	t=1.166 df=18	t=0.1595 df=18	t=3.285 df=18	t=7.974 df=18	t=0.03836 df=18	t=3.388 df=18	t=0.1516 df=18	t=0.5768 df=18	t=12.14, df=18	t=9.432, df=18
How big is the difference?
Mean ± SEM of column A	19.65 ± 0.1314, n=10	6.607 ± 0.06221, n=10	13.02 ± 0.1070, n=10	2.532 ± 0.1068, n=10	8.189 ± 0.06689, n=10	2.155 ± 0.04057, n=10	3.005 ± 0.03683, n=10	2.969 ± 0.04026, n=10	0.1057 ± 0.008849, n=10	0.1626 ± 0.005963, n=10	0.3611 ± 0.01135, n=10	0.5164 ± 0.01495, n=10	3.470 ± 0.03777, n=10	5.080 ± 0.07247, n=10	5.284 ± 0.02758, n=10	4.906 ± 0.03841, n=10	4.880 ± 0.06171, n=10	9.185 ± 0.07371, n=10	0.2345 ± 0.03638, n=10	0.1817 ± 0.004693, n=10	0.5087 ± 0.007279, n=10	0.2485	0.4675
Mean ± SEM of column B	17.56 ± 0.2121, n=10	5.522 ± 0.09634, n=10	12.01 ± 0.1214, n=10	2.600 ± 0.05318, n=10	7.136 ± 0.1305, n=10	1.882 ± 0.05074, n=10	2.566 ± 0.05383, n=10	2.642 ± 0.05820, n=10	0.1892 ± 0.01990, n=10	0.1820 ± 0.008545, n=10	0.4273 ± 0.03719, n=10	0.6515 ± 0.04395, n=10	3.535 ± 0.04907, n=10	5.199 ± 0.07117, n=10	5.293 ± 0.05490, n=10	4.648 ± 0.06844, n=10	5.809 ± 0.09878, n=10	9.181 ± 0.09460, n=10	0.1109 ± 0.002603, n=10	0.1808 ± 0.003636, n=10	0.4961 ± 0.02060, n=10	0.3311	0.5232
Difference between means	-2.089 ± 0.2495	-1.085 ± 0.1147	-1.008 ± 0.1618	0.06850 ± 0.1193	-1.053 ± 0.1466	-0.2728 ± 0.06496	-0.4397 ± 0.06522	-0.3265 ± 0.07077	0.0835 ± 0.02178	0.0194 ± 0.01042	0.0662 ± 0.03889	0.1351 ± 0.04642	0.0654 ± 0.06193	0.1184 ± 0.1016	0.009800 ± 0.06144	-0.2578 ± 0.07849	0.9288 ± 0.1165	-0.004600 ± 0.1199	-0.1236 ± 0.03647	-0.0009000 ± 0.005937	-0.0126 ± 0.02185	0.08261 ± 0.006803	0.05565 ± 0.005900
95% confidence interval	-2.613 to -1.565	-1.326 to -0.8444	-1.348 to -0.6675	-0.1821 to 0.3191	-1.361 to -0.7449	-0.4093 to -0.1363	-0.5767 to -0.3027	-0.4752 to -0.1778	0.03775 to 0.1292	-0.002492 to 0.04129	-0.01550 to 0.1479	0.03757 to 0.2326	-0.06470 to 0.1955	-0.09500 to 0.3318	-0.1193 to 0.1389	-0.4227 to -0.09291	0.6841 to 1.174	-0.2566 to 0.2474	-0.2002 to -0.04693	-0.01337 to 0.01157	-0.05850 to 0.03330	0.06832 to 0.09690	0.04325 to 0.06804
R squared	0.7957	0.8327	0.6828	0.01799	0.7413	0.4949	0.7163	0.5418	0.4496	0.1615	0.1387	0.32	0.05835	0.07019	0.001411	0.3748	0.7794	8.173e-05	0.3894	0.001275	0.01815	0.8912	0.8317
CTR mean	19.65	6.607	13.02	2.532	8.189	2.155	3.005	2.969	0.1057	0.1626	0.3611	0.5164	3.47	5.08	5.284	4.906	4.88	9.185	0.2345	0.1817	0.5087
CKO mean	17.56	5.522	12.01	2.6	7.136	1.882	2.566	2.642	0.1892	0.182	0.4273	0.6515	3.535	5.199	5.293	4.648	5.809	9.181	0.1109	0.1808	0.4961
	89.3639	83.578	92.2427	102.686	87.1413	87.3318	85.391	88.9862	178.997	111.931	118.333	126.162	101.873	102.343	100.17	94.7411	119.037	99.9565	47.2921	99.5047	97.5231
diff %	10.6361	16.422	7.7573	-2.68562	12.8587	12.6682	14.609	11.0138	-78.9972	-11.9311	-18.3329	-26.1619	-1.8732	-2.34252	-0.170326	5.25887	-19.0369	0.0435493	52.7079	0.495322	2.4769
Statistics for CTR samples below
ID:Label (AP measurements)	skull length (SL)	Nasal bone (NB)	Cranial vault (CV)	Ant. Cranial base (ACB)	Post. Cranial base PCB)	Presphenoid	basiosphenoid	basio-occipital	ISS width	SOS width	ISS height	SOS height	Ant facial height (AFH)	Ant. Cranial height (ACH)	Middle cranial height (MCH)	Post. Cranial height (PCH)	Ant. Width (Ant.)	Post. Skull width (Post)	frontal thickness	Parietal thickness	occipital thickness-side	Ant. Width (Ant.)	Post. Skull width (Post)	Ant facial height (AFH)	Ant. Cranial height (ACH)	Middle cranial height (MCH)	Post. Cranial height (PCH)
Number of values	10	10	10	10	10	10	10	10	10	10	10	10	10	10	10	10	10	10	10	10	10	10	10	10	10	10	10
Minimum	19.11	6.299	12.33	1.834	7.891	1.945	2.846	2.774	0.057	0.133	0.298	0.443	3.326	4.838	5.175	4.702	4.628	8.88	0.141	0.159	0.474		0.4675
25% Percentile	19.26	6.401	12.83	2.288	7.997	2.063	2.905	2.845	0.09275	0.1445	0.3323	0.4728	3.367	4.889	5.226	4.806	4.695	8.956	0.1696	0.1681	0.492		0.4675
Median	19.57	6.653	12.99	2.697	8.185	2.13	2.99	2.971	0.103	0.168	0.3685	0.528	3.442	5.033	5.265	4.953	4.865	9.184	0.1863	0.1805	0.51		0.4675
75% Percentile	20.04	6.754	13.3	2.751	8.354	2.276	3.126	3.066	0.1218	0.1735	0.3865	0.5488	3.583	5.277	5.355	5.005	5.109	9.392	0.2651	0.1963	0.5295		0.4675
Maximum	20.29	6.9	13.46	2.84	8.581	2.328	3.172	3.171	0.157	0.194	0.41	0.584	3.648	5.524	5.462	5.056	5.14	9.511	0.511	0.2005	0.541		0.4675
Mean	19.65	6.607	13.02	2.532	8.189	2.155	3.005	2.969	0.1057	0.1626	0.3611	0.5164	3.47	5.08	5.284	4.906	4.88	9.185	0.2345	0.1817	0.5087
Std. Deviation	0.4155	0.1967	0.3385	0.3377	0.2115	0.1283	0.1165	0.1273	0.02798	0.01886	0.03591	0.04726	0.1194	0.2292	0.08721	0.1215	0.1951	0.2331	0.115	0.01484	0.02302
Std. Error of Mean	0.1314	0.06221	0.107	0.1068	0.06689	0.04057	0.03683	0.04026	0.008849	0.005963	0.01135	0.01495	0.03777	0.07247	0.02758	0.03841	0.06171	0.07371	0.03638	0.004693	0.007279
Lower 95% CI of mean	19.35	6.466	12.77	2.29	8.038	2.063	2.922	2.878	0.08568	0.1491	0.3354	0.4826	3.384	4.916	5.221	4.819	4.741	9.019	0.1522	0.171	0.4922
Upper 95% CI of mean	19.95	6.748	13.26	2.773	8.341	2.246	3.089	3.06	0.1257	0.1761	0.3868	0.5502	3.555	5.244	5.346	4.993	5.02	9.352	0.3167	0.1923	0.5252
Sum	196.5	66.07	130.2	25.32	81.89	21.55	30.05	29.69	1.057	1.626	3.611	5.164	34.7	50.8	52.84	49.06	48.8	91.85	2.345	1.817	5.087
