# Supplementary material for: Control of craniofacial development by the collagen receptor, discoidin domain receptor 2
Source: eLife journal article supplement (doi:10.7554/elife.77257), 2023-01-19
Supplement: supp [file elife-77257-supp-v1.zip › elife_poa_e77257_Figure_7_figure_supplement_1.pdf]

**Figure 7-Figure Supplement 1**

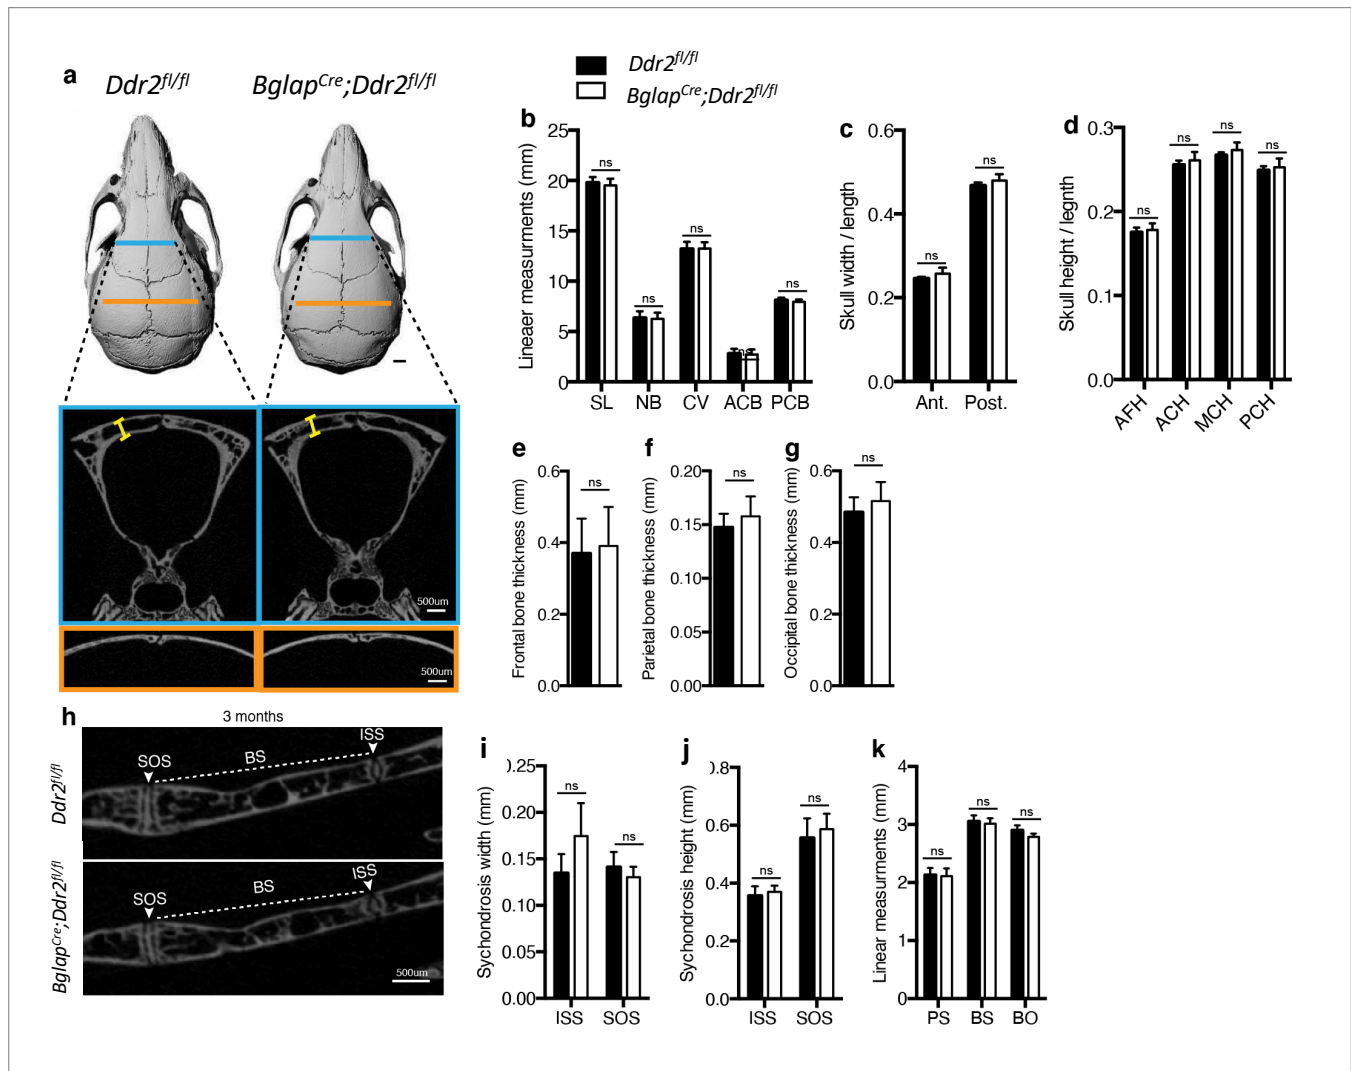

**Figure 7-figure supplement 1. *Ddr2* loss in mature osteoblasts using *Bglap<sup>Cre</sup>* did not result in craniofacial abnormalities.** **a-d**, Quantification using  $\mu$ CT scans shows no difference between *Ddr2<sup>fl/fl</sup>* and *Bglap<sup>Cre</sup>;Ddr2<sup>fl/fl</sup>* skull length, width and height at age of 3 months. Scale bar: 1mm in **a**. **e-g**, quantification showing no difference in frontal, parietal and occipital bone thickness. **h-k**, Quantification using  $\mu$ CT scans showing no changes in cranial base synchondroses or associated bones. Data are presented as mean  $\pm$  SD. ( $n=10$ ). ns, not significant, two tailed- unpaired  $t$  test.
