# Supplementary material for: Control of craniofacial development by the collagen receptor, discoidin domain receptor 2
Source: eLife journal article supplement (doi:10.7554/elife.77257), 2023-01-19
Supplement: supp [file elife-77257-supp-v1.zip › elife_poa_e77257_Figure_7_figure_supplement_2.pdf]

**Figure 7-Figure Supplement 2**

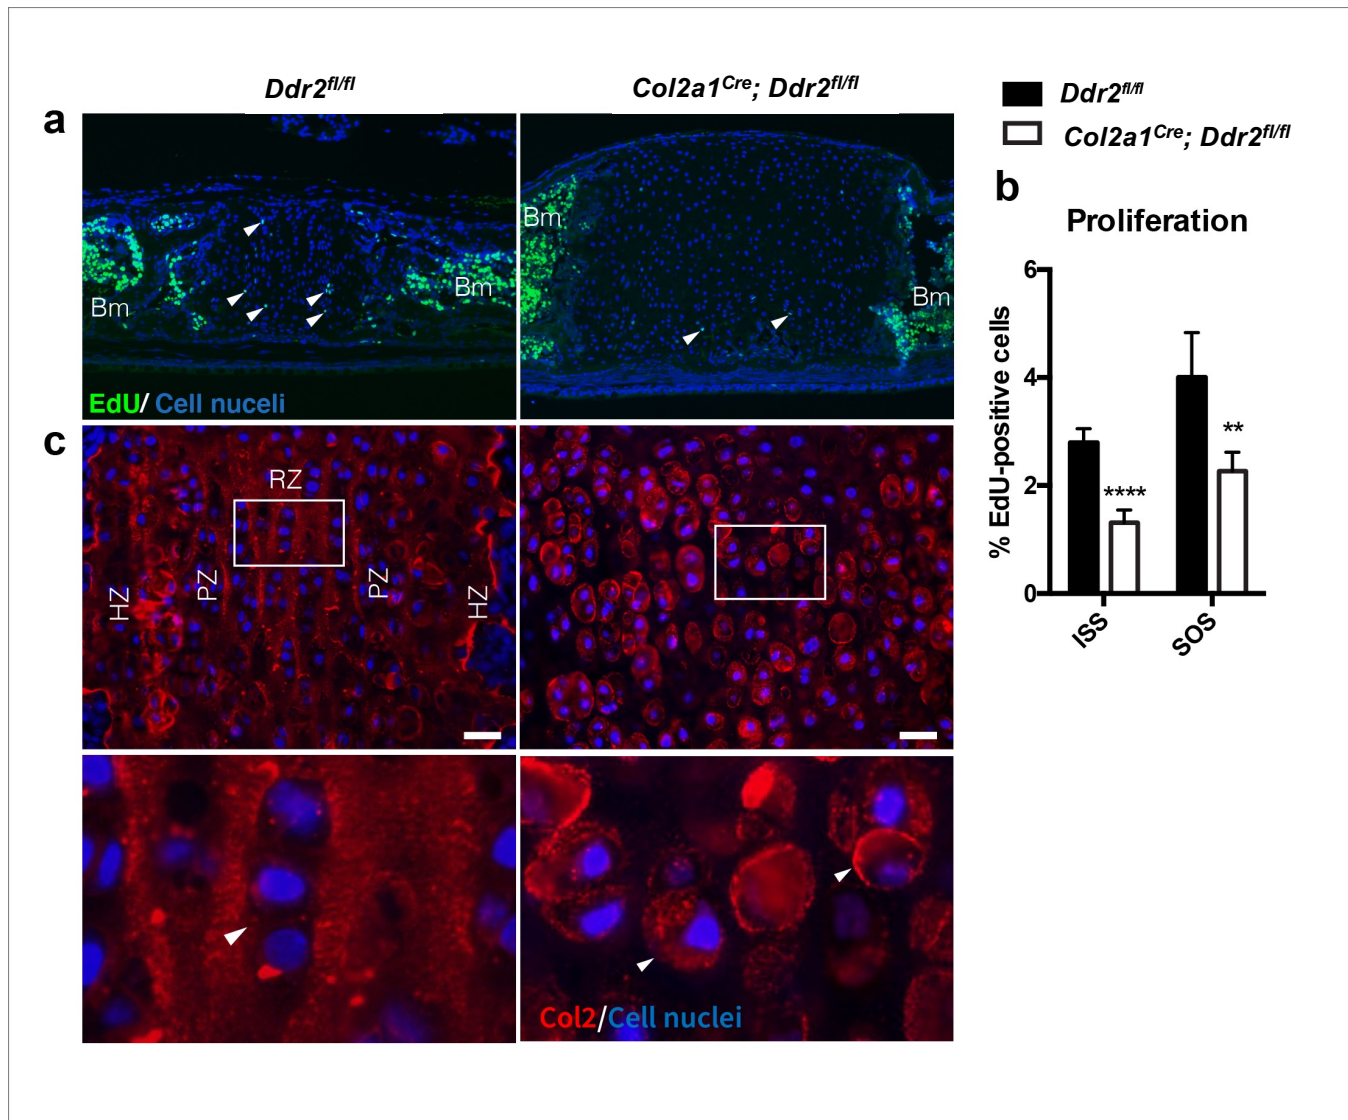

**Figure 7-figure supplement 2. Synchrondroses in *Col2a1<sup>Cre</sup>;Ddr2<sup>fl/fl</sup>* mutants exhibited deficient chondrocyte proliferation and abnormal type II collagen distribution. a**, EdU staining (green) showed a significant reduction of chondrocyte proliferation in *Col2a1<sup>Cre</sup>; Ddr2<sup>fl/fl</sup>* synchrondrosis. **b**, Bar graph shows quantification of EdU-positive cells in ISS and SOS. **c**, COL2 immunostaining shows altered type II collagen matrix in *Col2a1-Cre; Ddr2<sup>fl/fl</sup>* mice. n= 3 mice, \*\**P*<0.01, \*\*\*\**P*<0.0001. Scale bar: 50  $\mu$ m in (a), 20  $\mu$ m in (c).
