# Supplementary material for: Control of craniofacial development by the collagen receptor, discoidin domain receptor 2
Source: eLife journal article supplement (doi:10.7554/elife.77257), 2023-01-19
Supplement: supp [file elife-77257-supp-v1.zip › elife_poa_e77257_Figure_7_source_data_1.xlsx]

## Sheet: Skull Linear measurments
Skull linear measurments -- Col2a1-Cre;Ddr2flox--- 3months
Col2a1-Cre;Ddr2fl/fl --(cKO)
	1	2	3	4	5	6	7	8	9	10
ID:Label (AP measurements)	13034_139F2	13035_139F3	13036_139F6	13049_153F3	13050_425M5	13080_802M2	13073_788F1	13056_799M4	13054_514M5	13083_848M2
skull length (SL)-mm	18.633	18.667	19.11	18.979	18.976	19.32	19.216	19.226	19.173	19.143
Nasal bone (NB)	6.137	5.771	6.173	5.995	6.008	6.456	6.122	6.073	6.359	6.298
cranial valult (CV)	12.465	12.927	12.922	12.913	12.953	12.848	13.094	13.166	12.798	12.83
Ant. Cranial base (ACB)	2.344	2.784	2.501	2.63	2.689	2.538	2.628	2.589	2.531	2.469
post. Cranial base (PCB)	7.69	7.513	7.824	7.678	7.944	7.899	8.061	8.176	7.769	7.829
Presphenoid (PS)	2.182	2.147	2.229	2.145	2.259	2.205	2.436	2.385	2.258	2.235
Basiosphenoid (BS)	2.812	2.707	2.694	2.72	2.889	2.903	2.644	2.856	2.723	2.75
Basiooccipital (BO)	2.739	2.676	2.934	2.798	2.817	2.76	2.933	2.919	2.723	2.782
ISS width	0.391	0.526	0.352	0.466	0.472	0.386	0.554	0.592	0.526	0.529
SOS width	0.148	0.164	0.155	0.176	0.167	0.134	0.116	0.164	0.167	0.16
ISS height	0.401	0.609	0.615	0.462	0.424	0.466	0.537	0.463	0.535	0.74
SOS height	0.635	0.727	0.633	0.611	0.716	0.666	0.649	0.706	0.601	0.744
Ant facial height (AFH)	3.231	3.343	3.335	3.204	3.151	3.49	3.568	3.233	3.292	3.438
Ant. Cranial height (ACH)	5.003	4.831	5.093	5.114	4.984	5.141	5.169	5.215	5.095	4.978
Middle cranial height (MCH)	5.252	5.356	5.619	5.208	5.382	5.442	5.574	5.365	5.486	5.459
Post. Cranial height (PCH)	4.768	5.049	5.199	4.741	4.934	5.093	5.178	4.66	5.013	4.73
Ant. Width (Ant.)	4.846	5.133	5.002	5.434	4.948	5.298	5.323	5.194	5.462	5.157
Post. Skull width (Post)	9.181	9.287	9.572	9.533	9.158	9.454	9.485	9.463	9.611	9.454
Frontal bone thickness	0.222	0.114	0.2095	0.129	0.3595	0.2595	0.112	0.2	0.232	0.2395
Parietal bone thickness	0.153	0.145	0.138	0.1785	0.1985	0.1695	0.1485	0.144	0.1775	0.186
Occiptal bone thickness-side	0.452	0.43	0.545	0.509	0.549	0.592	0.598	0.53	0.661	0.563
Ddr2fl/fl ---(CTR)
	1	2	3	4	5	6	7	8	9	10
ID:Label (AP measurements)	13052_503F3	13053_509M2	13051_425M2	13055_799M1	13071_139F5	13072_153F4	13074_788F2	13081_802M4	1308_823M3	13084_849F2
skull length (SL)-mm	19.694	20.536	20.113	19.958	20.359	20.55	20.206	21.42	21.375	20.777
Nasal bone (NB)	6.901	7.388	6.966	7.058	7.02	7.253	7.118	7.679	7.861	7.234
cranial valult (CV)	12.762	13.071	13.132	12.87	13.339	13.235	13.073	13.709	13.534	13.512
Ant. Cranial base (ACB)	2.14	2.408	2.43	2.26	2.413	2.294	2.233	2.16	2.293	2.489
post. Cranial base (PCB)	8.172	8.48	8.365	8.242	8.327	8.524	8.25	9.07	8.755	8.517
Presphenoid (PS)	2.295	2.124	2.091	2.23	2.164	2.247	2.233	2.528	2.277	2.176
Basiosphenoid (BS)	3.055	3.305	3.306	3.091	3.206	3.363	3.101	3.343	3.367	3.366
Basiooccipital (BO)	2.807	3.051	2.922	2.891	2.973	2.914	2.9	3.151	3.111	2.959
ISS width	0.094	0.146	0.071	0.108	0.123	0.144	0.218	0.138	0.11	0.142
SOS width	0.143	0.135	0.123	0.116	0.141	0.141	0.14	0.124	0.123	0.143
ISS height	0.341	0.43	0.366	0.356	0.407	0.447	0.353	0.459	0.395	0.434
SOS height	0.49	0.586	0.532	0.532	0.525	0.506	0.476	0.67	0.557	0.557
Ant facial height (AFH)	3.517	3.224	3.355	3.373	3.567	3.218	3.424	3.385	3.44	3.416
Ant. Cranial height (ACH)	4.942	4.871	4.894	4.982	5.04	4.982	4.983	5.251	4.986	5.018
Middle cranial height (MCH)	5.501	5.369	5.24	5.159	5.403	5.412	5.368	5.521	5.42	5.484
Post. Cranial height (PCH)	5.441	5.261	5.189	5.105	5.211	5.223	5.024	5.432	5.219	5.391
Ant. Width (Ant.)	4.544	4.45	4.628	4.782	4.716	4.525	4.699	4.735	4.746	4.541
Post. Skull width (Post)	9.041	9.117	8.903	9.149	9.261	9.206	9.165	9.678	9.3	9.488
Frontal bone thickness	0.44	0.454	0.446	0.5015	0.4265	0.549	0.4845	0.4775	0.5185	0.4635
Parietal bone thickness	0.199	0.1835	0.1725	0.1815	0.176	0.177	0.1975	0.197	0.2015	0.1645
Occiptal bone thickness-side	0.481	0.618	0.615	0.669	0.545	0.663	0.64	0.691	0.681	0.556

## Sheet: Statistics export from Prism gr
Statistics for cKO samples below
ID:Label (AP measurements)	skull length (SL)	Nasal bone (NB)	Cranial vault (CV)	Ant. Cranial base (ACB)	Post. Cranial base PCB)	Presphenoid	basiosphenoid	basio-occipital	ISS width	SOS width	ISS height	SOS height	Ant facial height (AFH)	Ant. Cranial height (ACH)	Middle cranial height (MCH)	Post. Cranial height (PCH)	Ant. Width (Ant.)	Post. Skull width (Post)	frontal thickness	Parietal thickness	occipital thickness-side
Number of values	10	10	10	10	10	10	10	10	10	10	10	10	10	10	10	10	10	10	10	10	10
Minimum	18.63	5.771	12.47	2.344	7.513	2.145	2.644	2.676	0.352	0.116	0.401	0.601	3.218	4.871	5.159	5.024	4.846	9.158	0.112	0.138	0.43
25% Percentile	18.9	6.005	12.82	2.493	7.687	2.173	2.704	2.735	0.3898	0.1445	0.4525	0.6275	3.322	4.93	5.336	5.168	4.989	9.261	0.1253	0.1448	0.4948
Median	19.13	6.13	12.92	2.564	7.827	2.232	2.737	2.79	0.499	0.162	0.5005	0.6575	3.401	4.983	5.408	5.221	5.176	9.459	0.2158	0.1613	0.547
75% Percentile	19.22	6.313	12.99	2.645	7.973	2.291	2.864	2.923	0.5353	0.167	0.6105	0.7188	3.459	5.024	5.488	5.401	5.351	9.543	0.2445	0.1804	0.5935
Maximum	19.32	6.456	13.17	2.784	8.176	2.436	2.903	2.934	0.592	0.176	0.74	0.744	3.567	5.251	5.521	5.441	5.462	9.611	0.3595	0.1985	0.661
Mean	19.04	6.139	12.89	2.57	7.838	2.248	2.77	2.808	0.4794	0.1551	0.5252	0.6688	3.392	4.995	5.388	5.25	5.18	9.42	0.2077	0.1639	0.5429
Std. Deviation	0.2332	0.1981	0.1883	0.1229	0.1935	0.09538	0.08928	0.09213	0.08031	0.01803	0.1046	0.05101	0.1108	0.1038	0.1138	0.1369	0.2051	0.1578	0.07581	0.0208	0.06845
Std. Error of Mean	0.07375	0.06265	0.05955	0.03885	0.0612	0.03016	0.02823	0.02913	0.0254	0.005703	0.03308	0.01613	0.03503	0.03284	0.03599	0.04329	0.06484	0.04991	0.02397	0.006579	0.02164
Lower 95% CI of mean	18.88	5.997	12.76	2.482	7.7	2.18	2.706	2.742	0.4219	0.1422	0.4504	0.6323	3.313	4.921	5.306	5.152	5.033	9.307	0.1535	0.149	0.4939
Upper 95% CI of mean	19.21	6.281	13.03	2.658	7.977	2.316	2.834	2.874	0.5369	0.168	0.6	0.7053	3.471	5.069	5.469	5.348	5.326	9.533	0.2619	0.1787	0.5919
Sum	190.4	61.39	128.9	25.7	78.38	22.48	27.7	28.08	4.794	1.551	5.252	6.688	33.92	49.95	53.88	52.5	51.8	94.2	2.077	1.639	5.429
Unpaired t test
P value	< 0.0001	< 0.0001	0.0086	0.0001	< 0.0001	0.815	< 0.0001	0.0021	< 0.0001	0.0033	0.0024	< 0.0001	0.2648	0.1827	0.6316	0.0007	< 0.0001	0.0411	< 0.0001	0.0137	0.0284
P value summary	****	****	**	***	****	ns	****	**	****	**	**	****	ns	ns	ns	***	****	*	****	*	*
Significantly different? (P < 0.05)	Yes	Yes	Yes	Yes	Yes	No	Yes	Yes	Yes	Yes	Yes	Yes	No	No	No	Yes	Yes	Yes	Yes	Yes	Yes
One- or two-tailed P value?	Two-tailed	Two-tailed	Two-tailed	Two-tailed	Two-tailed	Two-tailed	Two-tailed	Two-tailed	Two-tailed	Two-tailed	Two-tailed	Two-tailed	Two-tailed	Two-tailed	Two-tailed	Two-tailed	Two-tailed	Two-tailed	Two-tailed	Two-tailed	Two-tailed
t, df	t=7.504 df=18	t=9.446 df=18	t=2.951 df=18	t=4.780 df=18	t=5.982 df=18	t=0.2374 df=18	t=9.856 df=18	t=3.585 df=18	t=12.36 df=18	t=3.382 df=18	t=3.535 df=18	t=5.279 df=18	t=1.151 df=18	t=1.386 df=18	t=0.4877 df=18	t=4.101 df=18	t=7.312 df=18	t=2.200 df=18	t=9.997 df=18	t=2.731 df=18	t=2.383 df=18
How big is the difference?
Mean ± SEM of column A	20.50 ± 0.1793, n=10	7.248 ± 0.09923, n=10	13.22 ± 0.09551, n=10	2.312 ± 0.03756, n=10	8.470 ± 0.08610, n=10	2.237 ± 0.03843, n=10	3.250 ± 0.03974, n=10	2.968 ± 0.03374, n=10	0.1294 ± 0.01252, n=10	0.1329 ± 0.003250, n=10	0.3988 ± 0.01358, n=10	0.5431 ± 0.01751, n=10	3.329 ± 0.04251, n=10	5.062 ± 0.03588, n=10	5.414 ± 0.04097, n=10	4.937 ± 0.06289, n=10	4.637 ± 0.03622, n=10	9.231 ± 0.06991, n=10	0.4761 ± 0.01209, n=10	0.1850 ± 0.004089, n=10	0.6159 ± 0.02168, n=10
Mean ± SEM of column B	19.04 ± 0.07375, n=10	6.139 ± 0.06265, n=10	12.89 ± 0.05955, n=10	2.570 ± 0.03885, n=10	7.838 ± 0.06120, n=10	2.248 ± 0.03016, n=10	2.770 ± 0.02823, n=10	2.808 ± 0.02913, n=10	0.4794 ± 0.02540, n=10	0.1551 ± 0.005703, n=10	0.5252 ± 0.03308, n=10	0.6688 ± 0.01613, n=10	3.392 ± 0.03503, n=10	4.995 ± 0.03284, n=10	5.388 ± 0.03599, n=10	5.250 ± 0.04329, n=10	5.180 ± 0.06484, n=10	9.420 ± 0.04991, n=10	0.2077 ± 0.02397, n=10	0.1639 ± 0.006579, n=10	0.5429 ± 0.02164, n=10
Difference between means	-1.455 ± 0.1938	-1.109 ± 0.1174	-0.3321 ± 0.1126	0.2583 ± 0.05404	-0.6319 ± 0.1056	0.01160 ± 0.04886	-0.4805 ± 0.04875	-0.1598 ± 0.04458	0.3500 ± 0.02832	0.0222 ± 0.006564	0.1264 ± 0.03576	0.1257 ± 0.02381	0.06340 ± 0.05508	-0.06740 ± 0.04863	-0.02660 ± 0.05454	0.3131 ± 0.07635	0.5431 ± 0.07427	0.1890 ± 0.08590	-0.2684 ± 0.02685	-0.02115 ± 0.007746	-0.07300 ± 0.03064
95% confidence interval	-1.862 to -1.047	-1.355 to -0.8620	-0.5686 to -0.09563	0.1448 to 0.3718	-0.8538 to -0.4100	-0.09104 to 0.1142	-0.5829 to -0.3781	-0.2535 to -0.06615	0.2905 to 0.4095	0.008409 to 0.03599	0.05127 to 0.2015	0.07568 to 0.1757	-0.05233 to 0.1791	-0.1696 to 0.03478	-0.1412 to 0.08798	0.1527 to 0.4735	0.3871 to 0.6991	0.008530 to 0.3695	-0.3248 to -0.2120	-0.03742 to -0.004877	-0.1374 to -0.008633
R squared	0.7578	0.8321	0.326	0.5593	0.6653	0.003122	0.8437	0.4166	0.8946	0.3886	0.4097	0.6076	0.06855	0.09641	0.01304	0.483	0.7481	0.2119	0.8474	0.2929	0.2398
CTR mean	20.5	7.248	13.22	2.312	8.47	2.237	3.25	2.968	0.1294	0.1329	0.3988	0.5431	3.329	5.062	5.414	4.937	4.637	9.231	0.4761	0.185	0.6159
CKO mean	19.04	6.139	12.89	2.57	7.838	2.248	2.77	2.808	0.4794	0.1551	0.5252	0.6688	3.392	4.995	5.388	5.25	5.18	9.42	0.2077	0.1639	0.5429
	92.878	84.6992	97.5038	111.159	92.5384	100.492	85.2308	94.6092	370.479	116.704	131.695	123.145	101.892	98.6764	99.5198	106.34	111.71	102.047	43.6253	88.5946	88.1474
diff %	7.12195	15.3008	2.49622	-11.1592	7.46163	-0.49173	14.7692	5.39084	-270.479	-16.7043	-31.6951	-23.1449	-1.89246	1.32359	0.480236	-6.33988	-11.7102	-2.04745	56.3747	11.4054	11.8526
Statistics for CTR samples below
ID:Label (AP measurements)	skull length (SL)	Nasal bone (NB)	Cranial vault (CV)	Ant. Cranial base (ACB)	Post. Cranial base PCB)	Presphenoid	basiosphenoid	basio-occipital	ISS width	SOS width	ISS height	SOS height	Ant facial height (AFH)	Ant. Cranial height (ACH)	Middle cranial height (MCH)	Post. Cranial height (PCH)	Ant. Width (Ant.)	Post. Skull width (Post)	frontal thickness	Parietal thickness	occipital thickness-side
Number of values	10	10	10	10	10	10	10	10	10	10	10	10	10	10	10	10	10	10	10	10	10
Minimum	19.69	6.901	12.76	2.14	8.172	2.091	3.055	2.807	0.071	0.116	0.341	0.476	3.151	4.831	5.208	4.66	4.45	8.903	0.4265	0.1645	0.481
25% Percentile	20.07	7.007	13.02	2.215	8.248	2.154	3.099	2.898	0.1045	0.123	0.3553	0.502	3.224	4.983	5.33	4.738	4.537	9.098	0.4445	0.1751	0.5533
Median	20.45	7.176	13.18	2.294	8.423	2.232	3.306	2.941	0.1305	0.1375	0.401	0.532	3.314	5.094	5.412	4.974	4.664	9.186	0.4705	0.1825	0.629
75% Percentile	20.93	7.461	13.52	2.417	8.582	2.282	3.364	3.066	0.1445	0.1415	0.4373	0.5643	3.451	5.148	5.508	5.114	4.738	9.347	0.5058	0.1979	0.672
Maximum	21.42	7.861	13.71	2.489	9.07	2.528	3.367	3.151	0.218	0.143	0.459	0.67	3.568	5.215	5.619	5.199	4.782	9.678	0.549	0.2015	0.691
Mean	20.5	7.248	13.22	2.312	8.47	2.237	3.25	2.968	0.1294	0.1329	0.3988	0.5431	3.329	5.062	5.414	4.937	4.637	9.231	0.4761	0.185	0.6159
Std. Deviation	0.5669	0.3138	0.302	0.1188	0.2723	0.1215	0.1257	0.1067	0.0396	0.01028	0.04293	0.05538	0.1344	0.1134	0.1296	0.1989	0.1145	0.2211	0.03822	0.01293	0.06857
Std. Error of Mean	0.1793	0.09923	0.09551	0.03756	0.0861	0.03843	0.03974	0.03374	0.01252	0.00325	0.01358	0.01751	0.04251	0.03588	0.04097	0.06289	0.03622	0.06991	0.01209	0.004089	0.02168
Lower 95% CI of mean	20.09	7.023	13.01	2.227	8.275	2.15	3.16	2.892	0.1011	0.1255	0.3681	0.5035	3.232	4.981	5.322	4.794	4.555	9.073	0.4488	0.1758	0.5668
Upper 95% CI of mean	20.9	7.472	13.44	2.397	8.665	2.323	3.34	3.044	0.1577	0.1403	0.4295	0.5827	3.425	5.143	5.507	5.079	4.719	9.389	0.5034	0.1942	0.665
Sum	205	72.48	132.2	23.12	84.7	22.37	32.5	29.68	1.294	1.329	3.988	5.431	33.29	50.62	54.14	49.37	46.37	92.31	4.761	1.85	6.159
