# Supplementary material for: Control of craniofacial development by the collagen receptor, discoidin domain receptor 2
Source: eLife journal article supplement (doi:10.7554/elife.77257), 2023-01-19
Supplement: supp [file elife-77257-supp-v1.zip › elife_poa_e77257_Figure_7_source_data_2.xlsx]

## Sheet: Sheet1
	Control samples (Ddr2fl/fl)								Spacing b/w chondrocytes (um)				Col2a1-Cre; Ddr2fl/fl								Spacing b/w chondrocytes (um)
	CTR_ISS.1.bmp	2	211.7	184	233	-100.8	427.6	4656.3	6.5				CKO1_ISSX20.1.bmp	6.1	225.2	152	244.7	-122.5	1364.6	14860	19.8
	CTR_ISS.1.bmp	2.1	225.6	204.3	231.7	-52.6	476.5	5189	6.6				CKO1_ISSX20.1.bmp	4.7	226.5	209.3	238.7	-63.9	1060.7	11550.7	15.2
	CTR_ISS.1.bmp	3.2	212.7	182.7	233.7	25.8	683.5	7443.3	10.4				CKO1_ISSX20.1.bmp	2.8	222.3	151.7	237	-46.3	632.7	6890	9.2
	CTR_ISS.1.bmp	1.4	226.2	202.3	246	-175.9	311.6	3393.3	4.2				CKO1_ISSX20.1.bmp	4.3	234.7	224.3	246	145.6	1012.8	11029.3	14
	CTR_ISS.1.bmp	2.1	215.6	207.3	223	-74.1	455.4	4959.7	6.6				CKO1_ISSX20.1.bmp	6.6	210.8	188	229	-143	1393.5	15175.3	21.6
	CTR_ISS.1.bmp	2.9	225.9	213.7	239	-128.4	663.9	7230	9.3				CKO1_ISSX20.1.bmp	5.5	225.4	218	234	-73.1	1241.8	13523.7	17.7
	CTR_ISS.1.bmp	3.1	218	213.3	222.7	-93.6	680.6	7411.3	9.9				CKO1_ISSX20.1.bmp	9.6	226.5	214.7	240.3	-109.8	2163	23555.3	31.2
	CTR_ISS.1.bmp	1.5	228.2	220.7	233.7	101.3	335.3	3651.7	4.5				CKO1_ISSX20.1.bmp	4	233.9	220.7	244.3	-29.6	945	10291	12.9
	CTR_ISS.1.bmp	3.9	220.6	212.3	229	-88.6	871.2	9487	12.6				CKO1_ISSX20.1.bmp	2.2	230.3	222.7	235.3	-87.5	507.5	5526.7	7
	CTR_ISS.1.bmp	6.2	228.2	212.3	244	-109	1424.8	15516	20.4				CKO1_ISSX20.1.bmp	4.1	226.3	213.7	236.3	148.8	934.9	10181.3	13.5
	CTR_ISS.1.bmp	0.5	219.7	212.3	224.7	18.4	100.9	1098.7	1.1				CKO1_ISSX20.1.bmp	6.7	226.1	192.3	241.3	-140.1	1515.8	16507	21.7
	CTR_ISS.1.bmp	1.4	214.3	205.3	224.3	21	295.1	3214	4.4				CKO1_ISSX20.1.bmp	3.5	226.6	201.7	234	-145.9	790.7	8610.7	11.3
	CTR_ISS.1.bmp	4	223.3	208.3	234.7	-105	902.2	9825	12.9				CKO1_ISSX20.1.bmp	3.5	228	218	236.3	-74.5	795.6	8663.7	11.3
	CTR_ISS.1.bmp	6.5	225.9	213.7	237	-129.8	1472.9	16039.7	21.2				CKO1_ISSX20.1.bmp	7.8	229.7	212.7	236.7	-73.3	1793.1	19526.7	25.3
	CTR_ISS.1.bmp	2.4	223.2	202.3	238.3	-92.3	532.9	5803.3	7.6				CKO1_ISSX20.1.bmp	1.8	223.8	213.3	248	3	411	4476.3	5.8
	CTR_ISS.1.bmp	0.9	221.7	208.3	229.3	-161.6	203.6	2217.3	2.9				CKO1_ISSX20.1.bmp	1	229.2	216	234.7	174.3	231.6	2521.7	3
	CTR_ISS.1.bmp	0.9	222.4	218.3	226.7	-18.4	204.2	2223.7	2.7				CKO1_ISSX20.1.bmp	10.9	227.2	204.7	238.7	-145	2482.6	27036	35.9
	CTR_ISS.1.bmp	2	221	213	226.7	-158.2	446.4	4861.3	6.3				CKO1_ISSX20.1.bmp	3.8	234.4	228.7	238	-60.3	882.6	9611.7	12.2
	CTR_ISS.1.bmp	0.8	215.1	202.3	219.7	-90	177.8	1936.3	2.3				CKO1_ISSX20.1.bmp	2.7	227.2	218.3	244	-98.1	605.1	6590	8.6
	CTR_ISS.1.bmp	1.7	225	215.7	232.3	-142.4	372	4050.7	5.1				CKO1_ISSX20.1.bmp	3.4	223.9	214.7	242.3	173.7	760.6	8283	11
	CTR_ISS.1.bmp	2.5	238.9	232.3	244	-90	592.2	6449.3	7.9				CKO1_ISSX20.1.bmp	3.2	222.2	215	228.7	-121.8	714.1	7777	10.3
	CTR_ISS.1.bmp	3.1	229.8	220.7	241	-88.3	717.6	7814.7	10				CKO1_ISSX20.1.bmp	4.9	231.2	221.3	239.3	-152.4	1125.2	12253	15.7
	CTR_ISS.1.bmp	2.7	226.3	210.3	233.7	133.5	602.6	6562	8.5				CKO1_ISSX20.1.bmp	2.8	229	214	237.7	-40.8	630.8	6869.3	8.8
	CTR_ISS.1.bmp	1.4	209.4	184	226.3	-153.4	288.4	3140.3	4.2				CKO1_ISSX20.1.bmp	4.5	232.4	217.7	241.7	-58.6	1045.6	11386.7	14.6
	CTR_ISS.1.bmp	3.5	223.5	216.7	229.3	-66.2	779.8	8491.7	11.2				CKO1_ISSX20.1.bmp	5.4	229.5	209.3	239.7	-121	1243.1	13537.7	17.7
	CTR_ISS.1.bmp	0.6	221.2	213	225.7	-161.6	142.2	1548.3	1.9				CKO1_ISSX20.1.bmp	5.9	224.7	168.7	240.7	169.9	1320.3	14378.3	19.1
	CTR_ISS.1.bmp	1.7	201.6	186.3	213.3	-102.5	351.7	3829.7	5.6				CKO1_ISSX20.1.bmp	7	227	219.7	235	-165.4	1584.5	17255.7	22.9
	CTR_ISS.1.bmp	3.4	210.5	172.7	224	-62.7	715.4	7790.3	11				CKO1_ISSX20.1.bmp	5	223.5	202.7	232.7	154.4	1108.4	12070	16.1
	CTR_ISS.1.bmp	1.9	206.7	134	238	177.1	398.6	4340.3	5.9				CKO1_ISSX20.1.bmp	3.4	213.8	206	223.3	-122.3	726.5	7911.7	10.8
	CTR_ISS.1.bmp	1.9	227.7	204.3	237.3	-60.9	439	4781	6.2				CKO1_ISSX20.1.bmp	2.7	215.3	197.3	229.7	152.5	573.4	6244.3	8.5
	CTR_ISS.1.bmp	2.1	211.4	193	232	-103.4	446.5	4862	6.7				CKO1_ISSX20.1.bmp	4.6	228.5	220.7	234.7	-60.8	1049.3	11427	14.9
	CTR_ISS.1.bmp	1.9	223.9	214.7	231.7	-49.1	431.7	4701	6				CKO1_ISSX20.1.bmp	3.5	225.9	204	235.3	115.9	788.1	8582.7	11.1
	CTR_ISS.1.bmp	2.2	218.6	212.7	221.7	72.3	481.8	5246.3	6.9				CKO1_ISSX20.1.bmp	4.6	227	206.3	234	171.7	1042.1	11349	14.7
	CTR_ISS.1.bmp	5	228.1	205.3	248.7	-94.3	1131.3	12320	16.1				CKO1_ISSX20.1.bmp	3.3	216.4	196.7	240.3	161.6	715.3	7790	10.5
	CTR_ISS.1.bmp	4.4	236	227.3	243	-118.2	1040.4	11330.3	14.2				CKO1_ISSX20.1.bmp	4.1	218.3	157.7	246	-37.6	902.1	9823.3	13.4
	CTR_ISS.1.bmp	0.8	218.2	206	226.7	172.9	180.3	1964	2.4				CKO1_ISSX20.1.bmp	6.5	221.9	209.3	228.7	176.7	1446.8	15756	21.2
	CTR_ISS.1.bmp	5.1	230.6	213.7	241.3	-103.8	1164.4	12680.3	16.4				CKO1_ISSX20.1.bmp	2.8	216.9	199.7	229.7	-35.3	597.6	6507.7	8.9
	CTR_ISS.1.bmp	2.5	215.6	185	225	173.2	534.6	5822	7.8				CKO1_ISSX20.1.bmp	4.5	222.8	208.3	232	-148.6	1002.6	10918.7	14.6
	CTR_ISS.1.bmp	4	218.5	167	238	173.4	882.7	9612.3	13.1				CKO1_ISSX20.1.bmp	5.2	225.5	198.7	233.3	-64.8	1180.4	12854.3	17.1
	CTR_ISS.1.bmp	2.4	208.9	177.3	216.7	-4.8	498.8	5432.3	7.4				CKO1_ISSX20.1.bmp	3.6	228.2	220.7	238	-154.8	817.2	8899.3	11.4
	CTR_ISS.1.bmp	3.1	218.2	202.7	229.3	-81.4	681.2	7418	9.9				CKO1_ISSX20.1.bmp	5.3	227.9	214.7	233.7	-135	1213.7	13217	17.1
	CTR_ISS.1.bmp	3.1	230	210.3	241	-57.3	718.2	7821	10.1				CKO1_ISSX20.1.bmp	5.3	227.9	214.7	233.7	-135	1213.7	13217	17.1
	CTR_ISS.1.bmp	4.3	226.1	209	234.7	-101.3	976	10628.3	13.9				CKO1_ISSX20.1.bmp	5.4	232.8	226.3	237.3	-172	1261.1	13733.7	17.4
	CTR_ISS.1.bmp	4	216.1	187.7	225.3	-72.4	872.9	9506.3	12.9				CKO1_ISSX20.1.bmp	5	230	206.7	241.3	145.7	1140.3	12418	16.1
	CTR_ISS.1.bmp	1.3	223.9	217.7	236	-151.4	287.9	3135	3.9				CKO1_ISSX20.1.bmp	3.6	234	219	243.7	-47.1	838.1	9127	11.6
	CTR_ISS.1.bmp	3.5	217.7	206	232.3	-57.2	759.8	8274.3	11.1				CKO1_ISSX20.1.bmp	5.8	226.3	76	237.7	-62.2	1309.4	14259	18.8
	CTR_ISS.1.bmp	6	221.9	193	240.3	-78.3	1324.3	14422	19.5				CKO1_ISSX20.1.bmp	7.1	227.6	212.7	243	-144.6	1609.6	17528.7	23
	CTR_ISS.1.bmp	5	224.9	211	235.7	-121.9	1115.3	12145.3	16.1				CKO1_ISSX20.1.bmp	1.7	226	204.3	236.3	-166.8	373.6	4068.7	5.2
	CTR_ISS.1.bmp	1	215.5	206	232	173.7	217.7	2370.7	2.9				CKO1_ISSX20.1.bmp	5.4	234.8	220.3	243.3	-56.9	1272	13851.7	17.5
	CTR_ISS.1.bmp	1.1	207.8	183.3	221.7	-158.2	228.9	2493	3.2				CKO1_ISSX20.1.bmp	2	226.5	220.7	234.3	-50.9	457.5	4982.3	6.3
	CTR_ISS.1.bmp	4.8	221.7	200.7	228	119.1	1058.4	11526.3	15.5				CKO1_ISSX20.1.bmp	3.2	226.2	212.7	234.3	-107.4	727.1	7918.3	10.2
	CTR_ISS.1.bmp	1.5	212.6	201.7	224.3	15.9	312.4	3402	4.4				CKO1_ISSX20.1.bmp	1.9	231.3	217	236.3	0	446	4857.3	6.1
	CTR_ISS.1.bmp	1.6	221.2	212	226.3	45	345.4	3761	4.8				CKO1_ISSX20.1.bmp	2.2	229.2	224.3	241.3	-135	505.1	5501	6.9
	CTR_ISS.1.bmp	0.9	224	207.7	236.7	83.7	205.7	2239.7	2.6				CKO1_ISSX20.1.bmp	3.6	231.4	214.7	240	-77.8	828.7	9024	11.6
	CTR_ISS.1.bmp	0.8	223.7	210.7	231	172.9	184.9	2013.7	2.4				CKO1_ISSX20.1.bmp	5.9	232.4	222	238.7	-128.5	1365.7	14873	19.1
	CTR_ISS.1.bmp	1	183.5	166	196.3	48.8	185.3	2018.3	3.1				CKO1_ISSX20.1.bmp	2	229.1	222	237.3	-84.8	462.8	5040.3	6.5
	CTR_ISS.1.bmp	3.7	214.7	200.3	238.7	112.6	788.6	8587.3	11.8				CKO1_ISSX20.1.bmp	4.6	230.7	224.3	236.3	-111.4	1059	11533	15
	CTR_ISS.1.bmp	0.7	185.7	176	194	-81.9	136.4	1485.7	2.1				CKO1_ISSX20.1.bmp	0.9	224.1	217.3	230.3	-122	205.8	2240.7	2.7
	CTR_ISS.1.bmp	3.2	197.9	165.3	222.7	-171.6	636.1	6926.7	10.4				CKO1_ISSX20.1.bmp	4.1	227.2	219	242	-166.9	938.9	10224.3	13.5
	CTR_ISS.1.bmp	1.4	220.5	202.7	251.3	-159	303.8	3308	4.2				CKO1_ISSX20.1.bmp	2.3	228.6	219.3	234.7	-157.8	524.9	5715.7	7.2
	CTR_8.3.bmp	2.3	235.9	229.3	239	4.8	541.5	5897	7.3				CKO1_ISSX20.1.bmp	1.6	228.5	221.7	233.7	156.8	356.7	3884	4.7
	CTR_8.3.bmp	1.8	235.8	229.7	245	-87	433.1	4717	5.8				CKO1_ISSX20.1.bmp	3.6	233.5	212.7	240.7	-139.2	836.4	9108	11.6
	CTR_8.3.bmp	5.3	236.4	232.3	241.3	-151.6	1259	13710.7	17.4				CKO1_ISSX20.1.bmp	5	234.7	230.7	238.3	-87.8	1163.8	12673.7	16.2
	CTR_8.3.bmp	1.5	233.3	216.7	239.7	65.2	342.7	3732	4.4				CKO1_ISSX20.1.bmp	5.5	232.9	76	242	2.9	1283.3	13975	18
	CTR_8.3.bmp	5.9	233.4	220.7	243	0.9	1371.4	14935	18.9				CKO1_ISSX20.1.bmp	4	228.9	220.3	235.7	-9.5	924.7	10070	12.9
	CTR_8.3.bmp	3.9	229.2	202.7	237.7	-64.1	883.8	9624.7	12.5				CKO1_ISSX20.1.bmp	5.1	223.8	76	238.7	-140.2	1130.3	12308.7	16.5
	CTR_8.3.bmp	1.3	232.9	230.3	236	125	299.4	3260	3.9				CKO1_ISSX20.1.bmp	2.3	228.4	218	235.3	153.4	524.4	5711	7.4
	CTR_8.3.bmp	2.9	236	228.3	243.7	35.8	693.6	7553.3	9.4				CKO1_ISSX20.1.bmp	5.3	229.4	204.3	238.7	-100.1	1221.7	13304	17.2
	CTR_8.3.bmp	1.7	237.1	229.3	241.3	-135	413.7	4505.3	5.6				CKO1_ISSX20.1.bmp	3.5	228.1	223	233.3	-6.2	796.1	8669.3	11.2
	CTR_8.3.bmp	5.3	230.5	181.7	239.3	-38.5	1227.6	13368.7	17.2				CKO1_ISSX20.1.bmp	3.2	222	206.7	228.3	-85	713.7	7771.7	10.4
	CTR_8.3.bmp	1.7	233.9	226	241.7	-139.8	386.7	4210.7	5.3				CKO1_ISSX20.1.bmp	1	234	229.3	238.3	-36.9	236.3	2573.7	3.2
	CTR_8.3.bmp	0.8	232.6	226.7	235.3	-90	192.2	2093.3	2.3				CKO1_ISSX20.1.bmp	7.4	231.8	219	240.7	-80.7	1724.4	18778.3	24.3
	CTR_8.3.bmp	2.5	233.9	227	238	-157.4	580	6316.3	7.7				CKO1_ISSX20.1.bmp	2	236.1	232	240	-70.7	476.9	5193.3	6.5
	CTR_8.3.bmp	0.8	233.3	227.3	237	-144.5	192.8	2100	2.4				CKO1_ISSX20.1.bmp	4.5	214.2	202	219.7	-78	964	10498	14.7
	CTR_8.3.bmp	1.6	231.8	222.7	236.7	-21.8	361.9	3940.7	4.8				CKO1_ISSX20.1.bmp	1.4	218.8	199.3	236.7	-138	301.3	3281.3	4.2
	CTR_8.3.bmp	1	234.4	225	239.7	-78.7	236.8	2578.3	2.9				CKO1_ISSX20.1.bmp	4.3	227.8	217	243.7	167.5	983.2	10706.7	13.9
	CTR_8.3.bmp	4.9	224.7	155	241.7	39.5	1093.7	11910.7	15.7				CKO1_ISSX20.1.bmp	5.4	229.9	222	239.3	-109.4	1245.6	13564.7	17.5
	CTR_8.3.bmp	4	235.1	231.3	238.3	-102.1	949.7	10342.3	13				CKO1_ISSX20.1.bmp	3	228.7	218.3	235.3	-8.9	692.9	7546	9.6
	CTR_8.3.bmp	3.9	226	214	231	-102.7	871.6	9491.3	12.5				CKO1_ISSX20.1.bmp	2.4	229.1	221	235.3	-23.5	547	5956.3	7.5
	CTR_8.3.bmp	2.8	228.1	214.3	236	-53.1	649.2	7070	9				CKO1_ISSX20.1.bmp	1.9	230.2	224	234.3	-17.5	444	4834.7	6.2
	CTR_8.3.bmp	1.3	221	212.3	227.7	13	284.1	3093.3	3.9				CKO1_ISSX20.1.bmp	1.1	221.2	216.3	225.7	-33.7	243.8	2654.7	3.3
	CTR_8.3.bmp	1.6	225	211.7	233.3	21.8	351.3	3825.7	4.8				CKO1_ISSX20.1.bmp	1.7	221	206	228.3	-132.5	365.4	3978.7	5
	CTR_8.3.bmp	0.8	228.5	215.3	235.7	7.1	188.9	2056.7	2.3				CKO1_ISSX20.1.bmp	1.5	222.9	210.3	232	53.1	327.4	3565.7	4.6
	CTR_8.3.bmp	3.6	220.9	202.3	230.7	26.6	791.1	8614.7	11.4				CKO1_ISSX20.1.bmp	8.6	227.6	188.3	238.3	-123.2	1964.8	21396.7	28.3
	CTR_8.3.bmp	1.3	224.6	217.3	241.3	-85.6	288.8	3145	3.9				CKO1_ISSX20.1.bmp	3.4	221.5	194	231.3	0	752.7	8197.3	10.8
	CTR_8.3.bmp	1.6	224.4	210.3	230.7	29.7	350.2	3814	4.9				CKO1_ISSX20.1.bmp	1.2	225.6	218.7	230.3	-99.5	269.4	2933.3	3.7
	CTR_8.3.bmp	2.8	225.2	208.3	233	-135	641	6980	9.1				CKO1_ISSX20.1.bmp	2	225	216.7	236	-25.3	454.5	4950	6.2
	CTR_8.3.bmp	1.7	228.4	214.7	234	158.2	377.5	4111	5				CKO1_ISSX20.1.bmp	2.3	220	213.7	226	-102.3	505	5499.7	7.2
	CTR_8.3.bmp	3.9	234.2	215	238.7	-171.9	924.7	10070.3	12.7				CKO1_ISSX20.1.bmp	0.9	219.5	208	231	148	201.6	2195.3	2.9
	CTR_8.3.bmp	1.7	235	224	239	-80.5	409.9	4464.3	5.4				CKO1_ISSX20.1.bmp	3.9	222.8	203	231.7	-125.2	859.3	9357.3	12.5
	CTR_8.3.bmp	1.6	233.2	216	237	-165.1	364	3964	4.7				CKO1_ISSX20.1.bmp	3.1	222.5	204.7	228.3	-15.7	694.6	7563.7	10.1
	CTR_8.3.bmp	5.1	237.2	229	244.3	-45	1197.8	13043.7	16.4				CKO1_ISSX20.1.bmp	4.5	222.8	204.3	229.3	-86.4	1002.4	10916.7	14.6
	CTR_8.3.bmp	1.7	230.3	185.7	237.3	25.2	401.7	4375	5.5				CKO1_ISSX20.1.bmp	4.4	223.8	213.3	234.7	-167.7	986.5	10743.3	14.2
	CTR_8.3.bmp	3.3	237.4	232.7	243.7	-85.1	784.8	8546.7	10.6				CKO1_ISSX20.1.bmp	2.2	222.4	214	232.7	-82.2	490.2	5338	6.9
	CTR_8.3.bmp	2.1	236.6	234	239.7	45	499.7	5441.3	6.5				CKO1_ISSX20.1.bmp	2.8	225.3	212.7	230.7	-178	641.3	6983.7	8.9
	CTR_8.3.bmp	2.9	234.4	228	241.7	-161.6	688.8	7501.3	9.4				CKO1_ISSX20.1.bmp	1.6	227.4	222.3	235.3	-82.9	355	3865.7	4.7
	CTR_8.3.bmp	0.8	230.4	223	246	-104	190.4	2073.7	2.4				CKO1_ISSX20.1.bmp	1	226.7	224	229.7	-24	229	2494	3.1
	CTR_8.3.bmp	1.5	233.9	229.3	240.7	-146.3	343.6	3741.7	4.6				CKO1_ISSX20.1.bmp	5.1	230.3	196.7	239.7	152.5	1163.4	12669	16.3
	CTR_8.3.bmp	1.7	230.2	220.3	233.7	-16.4	401.7	4374	5.4				CKO1_ISSX20.1.bmp	0.5	220.5	212.3	233	180	101.2	1102.3	1.2
	CTR_8.3.bmp	3.4	237.7	230	242	-63.4	807.5	8793.7	10.8				CKO1_ISSX20.1.bmp	1.6	226	220.7	231.3	-26.6	352.8	3841.7	4.7
	CTR_8.3.bmp	2	238.6	232	243.3	-27.8	482	5248.7	6.4				CKO1_ISSX20.1.bmp	4.2	224.9	218	232.3	166	949.9	10344	13.8
	CTR_8.3.bmp	5	234.4	222.7	239.7	29.5	1162.4	12658	16				CKO_460F2_3.4.bmp	1.7	196.3	173	210.3	-155	324.5	3533.3	5.1
	CTR_8.3.bmp	3.2	232.5	215	237.7	6.7	747.4	8139	10.4				CKO_460F2_3.4.bmp	2.8	200.1	173.3	207.7	-107.8	569.6	6202.7	9
	CTR_8.3.bmp	2.6	229.8	217.3	233.7	-6.3	590.9	6434.7	8.3				CKO_460F2_3.4.bmp	0.9	202.3	190.7	208	-54.5	185.7	2022.7	2.7
	CTR_8.3.bmp	2.9	228.8	216	234.7	43.7	672.2	7320	9.3				CKO_460F2_3.4.bmp	1.7	199	186.7	210	-119.7	328.9	3581.7	5
	CTR_8.3.bmp	2.5	221	203.3	228	-98.7	547.9	5967	8				CKO_460F2_3.4.bmp	1.9	202.8	190.7	212.3	-166	391	4258	6
	CTR_8.3.bmp	1	217.8	209.3	222.3	-11.3	220	2395.3	3				CKO_460F2_3.4.bmp	1.3	201.8	196	208	-85.6	259.4	2825	3.9
	CTR_8.3.bmp	0.9	219.7	208.3	229	-45	201.7	2197	2.7				CKO_460F2_3.4.bmp	2.2	201.4	186.3	208	46.7	444	4834.7	6.9
	CTR_8.3.bmp	0.7	220	216.3	223.7	-56.3	161.6	1760	2.2				CKO_460F2_3.4.bmp	4.4	201.4	192.3	209.3	-104.6	887.8	9668.7	14.2
	CTR_8.3.bmp	1	224.5	218	228.3	-36.9	226.8	2469.7	3.1				CKO_460F2_3.4.bmp	1.8	197.9	189.3	204.3	-137.3	363.5	3959	5.6
	CTR_8.3.bmp	3	236.7	233.3	240	-176.4	717.3	7811.3	9.7				CKO_460F2_3.4.bmp	1.3	199.1	190.7	210.7	-26.6	256	2787.7	4
	CTR_8.3.bmp	5.1	237.6	229.3	243	-87.9	1222	13307.3	16.5				CKO_460F2_3.4.bmp	1.1	196.5	176.7	202.7	74.7	216.5	2357.7	3.2
	CTR_8.3.bmp	3	236.2	224	241	-143.8	715.7	7794	9.8				CKO_460F2_3.4.bmp	2.9	199.6	190.3	211	-116.6	586.6	6388	9.5
	CTR_8.3.bmp	2.1	235.1	219.3	242.3	-2.6	496.6	5408.3	6.7				CKO_460F2_3.4.bmp	3.4	199.6	187	205.3	-125.9	678.1	7384	10.9
	CTR_8.3.bmp	2.9	234.9	225.3	239.3	-76.9	690.1	7515.7	9.4				CKO_460F2_3.4.bmp	3.3	199.9	186.7	204.7	-81.6	660.7	7195	10.5
	CTR_8.3.bmp	4.3	235.7	232	240	-11.1	1017.3	11078	14.1				CKO_460F2_3.4.bmp	1.4	202.6	189	209	-171.9	279.1	3039	4.2
	CTR_8.3.bmp	1.8	232	209.7	238.7	-150.6	426.1	4640	5.6				CKO_460F2_3.4.bmp	3.7	206.5	188.3	217.3	168.1	758.4	8259	11.9
	CTR_8.3.bmp	2.3	234.9	221	238.3	-24.4	539.3	5873	7.3				CKO_460F2_3.4.bmp	3.9	201.1	179.3	208.7	-101	775.7	8447	12.6
	CTR_8.3.bmp	1.3	232.5	228	238.7	-71.6	298.9	3254.7	3.8				CKO_460F2_3.4.bmp	2.4	201.7	193	210	-60.3	481.6	5244.3	7.5
	CTR_8.3.bmp	0.8	234.5	232.3	236.3	45	193.8	2110.3	2.6				CKO_460F2_3.4.bmp	2	201.8	181.7	216.3	-168.7	407.7	4440.3	6.3
	CTR_8.3.bmp	1	227.4	200.3	234.3	168.7	229.7	2501.7	2.9				CKO_460F2_3.4.bmp	2.2	204.5	190	216.7	-152.4	450.6	4907.3	7.1
	CTR_8.3.bmp	3.8	233.7	221.7	239.3	66.6	879.9	9582.3	12.1				CKO_460F2_3.4.bmp	2.3	204.7	199	214.3	-80.5	470	5118	7.3
	CTR_8.3.bmp	2.3	232.3	218.3	237.7	-2.4	533.3	5807.7	7.3				CKO_460F2_3.4.bmp	3.1	207.5	181.7	216.7	-141.1	647.7	7053.7	10
	CTR_8.3.bmp	2.3	232.6	227.7	236	104.6	534	5815.3	7.2				CKO_460F2_3.4.bmp	2.9	211.6	200	224	0	621.8	6771.7	9.4
	CTR_8.3.bmp	2.3	233.1	224.7	237.7	-67.8	535	5826.3	7.1				CKO_460F2_3.4.bmp	2.3	210	197	223.7	165.4	482.1	5250.3	7.2
	CTR_8.3.bmp	4.8	234.9	220.7	240	-108.4	1121.6	12214.7	15.4				CKO_460F2_3.4.bmp	4.6	202.3	178	213.3	-161.9	928.7	10113	14.7
	CTR_8.3.bmp	3.5	236.1	228	239.7	94.6	823.8	8971	11.1				CKO_460F2_3.4.bmp	2.6	203.5	191	213	15.1	523.4	5699.3	8.1
	CTR_8.3.bmp	0.9	237.7	235.3	241	-71.6	218.3	2377.3	2.7				CKO_460F2_3.4.bmp	4.8	201.8	191.3	207	-69	963.7	10494.7	15.4
	CTR_8.3.bmp	2.3	230.5	223.3	239	180	529.1	5762	7.4				CKO_460F2_3.4.bmp	3.9	199.6	183.7	209	29.6	788	8581	12.7
	CTR_8.3.bmp	2.6	232.6	190.3	239	144	598	6512.7	8.3				CKO_460F2_3.4.bmp	1.7	200.7	179	206.7	9.5	350.1	3813	5.5
	CTR_8.3.bmp	3.9	233.1	203.3	239	1.4	898.9	9789	12.4				CKO_460F2_3.4.bmp	6	198.7	146	209	-119.7	1185.8	12913.7	19.5
	CTR_8.3.bmp	1.2	230	220.3	236	45	274.6	2990	3.7				CKO_460F2_3.4.bmp	5.4	196.7	182.7	207.3	172.1	1065.5	11603.7	17.7
	CTR_8.3.bmp	2	223.1	216.3	227.3	-35.2	450.7	4908.3	6.2				CKO_460F2_3.4.bmp	2.2	206	190.3	215.7	-172.6	453.9	4943.3	7.1
	CTR_8.3.bmp	1.9	223.4	208.7	230.7	87.1	430.8	4691.3	6.1				CKO_460F2_3.4.bmp	6	198.5	175.3	211.3	-38	1184.9	12903.7	19.5
	CTR_8.3.bmp	1.5	232	226	236	-47.7	340.9	3712.7	4.6				CKO_460F2_3.4.bmp	4.2	203.8	178.7	219.7	180	861	9376.3	13.5
	CTR_8.3.bmp	1.7	223.9	218.3	228.3	-80	370	4029.7	5.1				CKO_460F2_3.4.bmp	6.5	205.5	171.7	220	-136.2	1339.7	14589.3	21.2
	CTR_8.3.bmp	1	228.3	218.3	234	135	230.6	2511.3	3.1				CKO_460F2_3.4.bmp	5.1	204.2	179.3	219	-156.8	1031.3	11231	16.2
	CTR_8.3.bmp	2	233	227.3	236.3	29.1	470.7	5126.3	6.2				CKO_460F2_3.4.bmp	1.6	200.3	194	204.7	-127.6	312.7	3405.3	5
	CTR_8.3.bmp	3.9	236.7	225.7	244	83	912.8	9940	12.3				CKO_460F2_3.4.bmp	4	205.8	191.7	219	-79.5	831.3	9053.3	13.1
	CTR_F3B_4.3.bmp	2.8	223.2	214.3	234.7	-105.9	635.5	6920.3	9				CKO_460F2_3.4.bmp	2.2	202.5	186.3	214.3	-133.3	446.3	4859.7	7
	CTR_F3B_4.3.bmp	1.8	224.5	212	233.3	-42.9	412.3	4489.7	5.8				CKO_460F2_3.4.bmp	3.9	209.9	192.3	223	-144.8	809.4	8814.7	12.5
	CTR_F3B_4.3.bmp	2.2	211.8	190.3	232.7	-175	466.7	5082	7				CKO_460F2_3.4.bmp	3.7	212.1	194.7	226	162.5	779.2	8485.3	11.9
	CTR_F3B_4.3.bmp	2.2	222.8	208.3	231.7	-46.7	491.1	5347.7	7				CKO_460F2_3.4.bmp	4.6	207.7	185	217.7	131.7	953.5	10384	14.9
	CTR_F3B_4.3.bmp	1.6	226	215.3	237.3	-122.7	352.7	3841.3	5				CKO_460F2_3.4.bmp	7.7	200.8	170.3	213.7	-162.4	1549	16869	25.1
	CTR_F3B_4.3.bmp	1.5	213.7	193	229.3	-11.3	314	3419.7	4.5				CKO_460F2_3.4.bmp	3.9	198.2	157	211.3	166.3	782.4	8520.7	12.6
	CTR_F3B_4.3.bmp	1	218.2	206.7	225.3	0	220.4	2400.7	3				CKO_460F2_3.4.bmp	3.4	201.2	186.3	206.7	-88.4	683.7	7445.3	10.8
	CTR_F3B_4.3.bmp	1.6	217.8	208.7	220.7	165.1	340	3702.3	4.7				CKO_460F2_3.4.bmp	1.7	196.2	172.3	206.7	-109.4	324.4	3532.3	5.3
	CTR_F3B_4.3.bmp	2.3	216.6	203.3	226.7	-133.3	497.2	5414	7.2				CKO_460F2_3.4.bmp	2.6	201.3	192	209.7	-96.3	517.6	5636.7	8.1
	CTR_F3B_4.3.bmp	1.6	220.6	215	238.7	3.6	344.3	3749.7	4.9				CKO_460F2_3.4.bmp	2.2	200.8	194.3	214.3	-77.7	442.5	4818.7	7
	CTR_F3B_4.3.bmp	1.8	223.8	216.3	233.7	-14.7	411	4476	5.8				CKO_460F2_3.4.bmp	0.9	194.6	190	201.7	-125.5	178.7	1946	2.7
	CTR_F3B_4.3.bmp	1.8	222.5	207.7	237.3	-112.4	408.7	4450.7	5.8				CKO_460F2_3.4.bmp	3.7	201.6	179.3	208.3	112.6	740.6	8064.7	11.9
	CTR_F3B_4.3.bmp	1.2	214.7	198.7	224	-51.3	256.3	2791	3.8				CKO_460F2_3.4.bmp	4.2	199.2	179.7	209	165.7	841.6	9165.3	13.6
	CTR_F3B_4.3.bmp	3.2	224.5	218.3	231	-35.5	721.5	7857	10.2				CKO_460F2_3.4.bmp	7.6	197.2	186.3	205.3	-90	1503	16367.7	24.7
	CTR_F3B_4.3.bmp	1.6	219.2	215.7	227	-97.1	342.2	3726.7	4.9				CKO_460F2_3.4.bmp	7.9	200	176.3	213.7	-126.3	1579.6	17202	25.7
	CTR_F3B_4.3.bmp	3.9	223.4	216	231.3	-140.9	861.6	9383	12.5				CKO_460F2_3.4.bmp	1.7	196.7	177	207.3	-110.6	343.2	3737	5.3
	CTR_F3B_4.3.bmp	2.3	220.6	212.7	226.7	-27.6	506.5	5516	7.3				CKO_460F2_3.4.bmp	2.8	207.2	197.7	218.3	-80.5	589.8	6422.7	9.2
	CTR_F3B_4.3.bmp	1.7	216	208.3	219.7	-83.7	376.9	4104	5.5				CKO_460F2_3.4.bmp	2.6	203.6	179.3	219.7	-136.5	523.5	5701	8.1
	CTR_F3B_4.3.bmp	2.6	221	211.7	224.7	-112.6	568.1	6187	8.1				CKO_460F2_3.4.bmp	2.3	209.1	197.7	222	-2.4	480	5227.3	7.3
	CTR_F3B_4.3.bmp	1	208.9	206	212.7	-71.6	211	2298	3				CKO_460F2_3.4.bmp	5.3	207.9	185	223.7	-127.9	1107	12055.3	17.3
	CTR_F3B_4.3.bmp	1.3	217.2	209.7	225.7	-153.4	279.2	3041	4.1				CKO_460F2_3.4.bmp	6.3	201.9	183	217.7	-63.1	1279.4	13933	20.7
	CTR_F3B_4.3.bmp	1.4	219.9	215	228.3	0	302.9	3299	4.2				CKO_460F2_3.4.bmp	2.6	205	196	216	111.8	527	5739	8.2
	CTR_F3B_4.3.bmp	1.9	226.3	216	228.7	-177	436.4	4752.7	5.9				CKO_460F2_3.4.bmp	5.3	206.7	193.3	215	-152.5	1100.7	11986.3	17.1
	CTR_F3B_4.3.bmp	1.3	210.1	172.7	228	171.3	270.1	2941	4				CKO_460F2_3.4.bmp	1.7	202.1	183.3	214	-121	352.6	3839.3	5.4
	CTR_F3B_4.3.bmp	1.5	220.6	215	225	-148.4	324.1	3529.3	4.6				CKO_460F2_3.4.bmp	2.8	199.9	173.7	213.7	-176.2	569	6196.7	9.1
	CTR_F3B_4.3.bmp	2.4	220.8	210	227.3	-83.2	527.2	5741	7.5				CKO_460F2_3.4.bmp	6.8	203.7	182	216.7	-43.3	1384.4	15075.7	22.1
	CTR_F3B_4.3.bmp	1.7	213.9	203.7	221.7	-61.9	353.5	3850	5.1				CKO_460F2_3.4.bmp	4.9	204.7	196	210	28.5	996.4	10850.7	15.8
	CTR_F3B_4.3.bmp	1.7	218.5	212.7	224	-127.6	361.2	3933.3	5.1				CKO_460F2_3.4.bmp	3.1	205.7	191.7	216.3	-81.4	642.3	6994.7	10.1
	CTR_F3B_4.3.bmp	3.6	227	203.7	240	-91.5	812.8	8851.3	11.5				CKO_460F2_3.4.bmp	5	206.3	179	218	24.2	1023	11140	16.1
	CTR_F3B_4.3.bmp	1.7	219.6	209.7	225.3	-90	383.1	4171.7	5.5				CKO_460F2_3.4.bmp	6.5	202.9	186.3	212	-52	1322.8	14405	21.2
	CTR_F3B_4.3.bmp	2.7	220.3	204.3	225	167.5	586.7	6389	8.3				CKO_460F2_3.4.bmp	2.5	205.2	188	215	-8.7	508.8	5540.3	7.8
	CTR_F3B_4.3.bmp	2.8	218.5	209	223.7	-150	621.9	6772.3	9.2				CKO_460F2_3.4.bmp	1.7	195.2	173	206	176.4	322.6	3513	5
	CTR_F3B_4.3.bmp	2	220.2	194	225.7	33.7	444.8	4843.7	6.4				CKO_460F2_3.4.bmp	2.8	201.2	181	210	180	572.8	6238	8.9
	CTR_F3B_4.3.bmp	2.9	221.5	216	228.3	-95.7	650.8	7087.7	9.3				CKO_460F2_3.4.bmp	6.5	201.4	176.3	217.7	-115.8	1313.2	14300.7	21.3
	CTR_F3B_4.3.bmp	2.6	211.9	204.7	218.7	-100.9	544.8	5932.7	8.1				CKO_460F2_3.4.bmp	6.2	206.2	168	221.7	0	1268.4	13813.3	20
	CTR_F3B_4.3.bmp	1.5	218.6	204.3	224.7	155.2	321.2	3498.3	4.5				CKO_460F2_3.4.bmp	3.2	203.3	188	214	-162.6	653.4	7115.3	10.3
	CTR_F3B_4.3.bmp	1.6	216.9	210	222.7	-100.6	338.6	3687.7	4.8				CKO_460F2_3.4.bmp	2.1	199.5	192.3	208.3	158.2	421.3	4588	6.7
	CTR_F3B_4.3.bmp	2.8	223.2	210.7	241.3	105.4	635.5	6920.3	9				CKO_460F2_3.4.bmp	1.7	204.5	199.7	209.3	-73.6	356.8	3885.3	5.5
	CTR_F3B_4.3.bmp	1.3	208	196.3	215.3	18.4	267.5	2912.7	4				CKO_460F2_3.4.bmp	1.8	204.1	184.7	210.7	-51.8	374.9	4082.3	5.6
	CTR_F3B_4.3.bmp	1.6	214.3	207	221.3	-90	334.6	3643.7	4.8				CKO_460F2_3.4.bmp	9.6	198.7	172.7	209.7	-82.3	1915.9	20864	31.6
	CTR_F3B_4.3.bmp	2.8	220.2	209.3	234	-99.8	606.7	6606.7	8.8				CKO_460F2_3.4.bmp	4.9	203.2	182	212.7	-21.6	989.1	10771.3	15.8
	CTR_F3B_4.3.bmp	3	219.6	206.7	239.7	-67.5	665.4	7246.7	9.7				CKO_460F2_3.4.bmp	3.6	202.4	189	214.7	-39.6	724.9	7893.7	11.5
	CTR_F3B_4.3.bmp	1.7	215.4	208	219	-72.6	356	3876.7	5.2				CKO_460F2_3.4.bmp	8.7	206.9	197	220.7	-83.3	1804.9	19655.7	28.5
	CTR_F3B_4.3.bmp	3.9	223.3	218.3	230.3	139.8	881.7	9601.3	12.6				CKO_460F2_3.4.bmp	3.1	203.3	192	208.7	-42.5	634.8	6913	10
	CTR_F3B_4.3.bmp	2.8	217.5	198.7	225	-68.6	619.2	6742.7	9.1				CKO_460F2_3.4.bmp	4.5	203.4	194.7	214.7	-125.7	915	9964.7	14.5
	CTR_F3B_4.3.bmp	1.3	220.4	206.7	229.7	153.4	283.3	3085.3	3.9				CKO_460F2_3.4.bmp	7.1	197.3	184.7	209.3	-24.9	1395.3	15194.3	23.1
	CTR_F3B_4.3.bmp	1.7	215.9	174.3	225.3	176.4	356.8	3885.7	5				CKO_460F2_3.4.bmp	10.4	206.8	166.3	219.7	171.8	2145.8	23367.3	34
	CTR_F3B_4.3.bmp	1.9	216.8	211.7	221	0	418.1	4553.3	5.9				CKO_460F2_3.4.bmp	5.7	200.7	185.3	209	-156.8	1142.4	12440.3	18.4
	CTR_F3B_4.3.bmp	2	218.4	206	223	27.8	441.2	4804.7	6.5				CKO_460F2_3.4.bmp	6.3	206.2	192	211.3	-89.2	1306.4	14226.3	20.7
	CTR_F3B_4.3.bmp	1.2	212.4	206	222.3	-138.4	253.6	2761.3	3.6				CKO_460F2_3.4.bmp	6.3	203.4	187.7	219.7	136.8	1288.5	14031.7	20.5
	CTR_F3B_4.3.bmp	1	220.7	211.7	246.7	-78.7	223	2428	2.9				CKO_460F2_3.4.bmp	4.2	209.8	198.3	219.3	-162	886.1	9650	13.5
	CTR_F3B_4.3.bmp	1.2	209.6	200	214.3	-169.7	250.3	2725.3	3.5				CKO_460F2_3.4.bmp	11	205.8	181.7	222.7	142.5	2268.3	24701.3	36.1
	CTR_F3B_4.3.bmp	1.4	209.6	188	221	-77.9	288.6	3143.3	4.3				CKO_460F2_3.4.bmp	10.7	206	148.7	220.7	170.5	2194.6	23898.7	34.9
	CTR_F3B_4.3.bmp	4.4	215.4	208.3	219.7	85.1	949.4	10339.3	14.3				CKO_460F2_3.4.bmp	6.1	201.4	180.3	214.3	-111.8	1220.5	13291.7	19.7
	CTR_F3B_4.3.bmp	0.6	221.5	216	226	-170.5	142.4	1550.3	1.7				CKO_460F2_3.4.bmp	3.5	211	172.7	222	-38.4	736.2	8017.3	11.2
	CTR_F3B_4.3.bmp	2.5	213.9	208.3	217.7	-81.3	530.4	5775.7	7.8				CKO_460F2_3.4.bmp	4.8	207.9	164.7	223.7	-154.9	992.6	10809.7	15.6
	CTR_F3B_4.3.bmp	1.2	217.1	197.7	228	-125	259.2	2822.7	3.6				CKO_460F2_3.4.bmp	7.1	209.2	149.7	228.3	-158.5	1478.9	16105.7	23.1
	CTR_F3B_4.3.bmp	1.2	211.5	200	216.3	20	252.5	2749.7	3.5				CKO_460F2_3.4.bmp	3.9	209.7	204.7	215	-128.2	828.2	9018.7	12.7
	CTR_F3B_4.3.bmp	2.6	213.3	205.3	219.7	-83.4	548.4	5971.7	8.1				CKO_460F2_3.4.bmp	2.9	200.6	171.7	214	146.8	589.4	6418.7	9.3
	CTR_F3B_4.3.bmp	2.9	217.1	209.3	222	-80.8	638	6947.3	9.5				CKO_460F2_3.4.bmp	7.6	207.6	186.3	218.3	-175.1	1582.4	17232.3	25
	CTR_F3B_4.3.bmp	3.4	214	202.3	221	-123.7	727	7917	11				CKO_460F2_3.4.bmp	5.9	209.1	175	219.3	-168.2	1228.8	13381.7	19
	CTR_F3B_4.3.bmp	2.4	221.7	210.7	241	21.4	529.3	5764	7.7				CKO_460F2_3.4.bmp	7.8	212.1	200.3	225.7	171.9	1655.2	18025.3	25.6
	CTR_F3B_4.3.bmp	3.8	211.4	194.7	217.7	115.3	796	8668	12.1				CKO_460F2_3.4.bmp	6.3	203.6	84	221.7	-49.8	1289.8	14046.3	20.6
													CKO_460F2_3.4.bmp	5	203.8	192.7	210.3	-87.8	1010.3	11002.7	16.2
													CKO_460F2_3.4.bmp	8.7	204.3	198.7	209.3	-114.6	1782.3	19409.7	28.4
													CKO_460F2_3.4.bmp	11.1	204.7	194.7	213.3	-73.1	2274.9	24774	36.5
													CKO_460F2_3.4.bmp	9.3	203.2	189.7	213.7	-131.3	1884.6	20523.3	30.3
													CKO_460F2_3.4.bmp	3.1	205.7	200.3	210.7	-45	642.3	6995	10
													CKO_460F2_3.4.bmp	4.9	202.9	188.7	212.7	13.2	987.4	10752.7	15.8
													CKO_F8_13.3.bmp	8.4	223.6	188	239	-135	1889	20571	27.4
													CKO_F8_13.3.bmp	3	229.2	204.3	245	136.3	694.5	7563	9.6
													CKO_F8_13.3.bmp	2.1	225.6	184.7	234.7	79.2	476.4	5187.7	6.6
													CKO_F8_13.3.bmp	5.4	230.8	219	238.3	0	1250.6	13619	17.6
													CKO_F8_13.3.bmp	1.3	229.9	204.3	249	-94.4	295.5	3218	4.1
													CKO_F8_13.3.bmp	2.7	224.7	191	250.3	-72.9	598.4	6516.3	8.5
													CKO_F8_13.3.bmp	7.1	224	196.3	235.3	-137.7	1583.5	17244.3	22.9
													CKO_F8_13.3.bmp	4.2	228.8	218.7	239	-82.2	966.5	10524.7	13.7
													CKO_F8_13.3.bmp	1.6	223.2	204	230.7	-50.2	348.4	3793.7	4.9
													CKO_F8_13.3.bmp	1.7	222.5	209	230.7	-118.1	367.8	4005.3	5.2
													CKO_F8_13.3.bmp	5.8	228.6	217.3	236	-65.5	1322.7	14404	18.8
													CKO_F8_13.3.bmp	3.3	225.1	200.3	236.7	-161.6	744.2	8104.3	10.6
													CKO_F8_13.3.bmp	1.8	227.5	206.7	236.7	-156	417.8	4549.3	5.9
													CKO_F8_13.3.bmp	4.9	229	215	238	-17.7	1114.4	12135.7	15.9
													CKO_F8_13.3.bmp	1.9	222.1	189.7	231	-67.2	428.3	4663.7	6.2
													CKO_F8_13.3.bmp	1.7	220.9	203	233.7	10	365.1	3976	5.1
													CKO_F8_13.3.bmp	1.9	231.3	217	237	180	446.1	4858.3	6.1
													CKO_F8_13.3.bmp	1.4	225.2	205.7	239.7	-146.3	310.2	3377.7	4.4
													CKO_F8_13.3.bmp	8.5	232.1	222.7	240	-80	1982.1	21585	27.9
													CKO_F8_13.3.bmp	2.9	232.6	225.3	243.3	-75.1	683.5	7443	9.4
													CKO_F8_13.3.bmp	4.1	233.7	220.7	246.3	59.3	965.8	10517.3	13.2
													CKO_F8_13.3.bmp	7.3	227.5	208.3	238.7	-87.1	1650.1	17969.7	23.7
													CKO_F8_13.3.bmp	2	225.7	217.7	232	-131.2	455.9	4964.3	6.4
													CKO_F8_13.3.bmp	1.8	227.4	216.7	236.3	-51.3	417.7	4548.3	5.9
													CKO_F8_13.3.bmp	3.2	230.6	218.3	236.3	3.4	741	8070	10.3
													CKO_F8_13.3.bmp	3.1	225.3	216.3	230.3	5.2	703.3	7659.3	10.1
													CKO_F8_13.3.bmp	2.3	231.5	219.7	238.7	-33	531.5	5787.7	7.2
													CKO_F8_13.3.bmp	7.3	230.1	192.3	239.7	-90	1690.4	18408.3	24
													CKO_F8_13.3.bmp	10.4	219.5	190.3	254	-122.6	2277.2	24799	33.9
													CKO_F8_13.3.bmp	10.4	225.1	200.7	243	-108.3	2335.4	25432	33.9
													CKO_F8_13.3.bmp	9.5	225.4	205.7	240	-108.3	2131.4	23211.3	30.9
													CKO_F8_13.3.bmp	1.4	226.5	213	240	-167.9	312	3398	4.3
													CKO_F8_13.3.bmp	1.7	232.1	225.7	239.7	-60.6	405	4410	5.5
													CKO_F8_13.3.bmp	4.7	225.8	198	237.3	43.4	1057.6	11517.7	15
													CKO_F8_13.3.bmp	1.6	224.5	214.3	233.7	-58.4	350.5	3816.7	4.7
													CKO_F8_13.3.bmp	1.2	230.8	226.7	237.3	0	275.6	3001	3.6
													CKO_F8_13.3.bmp	6	228.5	216	247.7	99	1364.2	14855.7	19.4
													CKO_F8_13.3.bmp	4.2	206.1	152.3	231.7	62.3	870.8	9482.7	13.6
													CKO_F8_13.3.bmp	3.9	230.6	222	243.7	-101	910.6	9916	12.8
													CKO_F8_13.3.bmp	3.6	227.1	219.3	234.3	-87	813.2	8856	11.5
													CKO_F8_13.3.bmp	1.7	229.7	222.7	235.7	-139.8	379.7	4134.7	5.2
													CKO_F8_13.3.bmp	1.3	230.9	225	234	-103	296.8	3232	4
													CKO_F8_13.3.bmp	3.6	229	207	241.3	-90	820.1	8931.3	11.5
													CKO_F8_13.3.bmp	2.5	230.5	217.7	236.7	-19.8	571.6	6224.7	7.9
													CKO_F8_13.3.bmp	3.1	224.8	210.7	237.7	-90	702	7644.3	9.9
													CKO_F8_13.3.bmp	3.8	228.3	213.3	243.7	32.5	859.4	9359.3	12
													CKO_F8_13.3.bmp	7.2	229.3	216	239.7	-122.2	1642.6	17888.3	23.3
													CKO_F8_13.3.bmp	2.3	230.4	212.7	239.3	-53.6	529	5760.3	7.4
													CKO_F8_13.3.bmp	2.2	229	215.7	234.7	-135	504.6	5495	7
													CKO_F8_13.3.bmp	2.8	226.9	216	239.7	-53.1	646	7035	9
													CKO_F8_13.3.bmp	2.8	231.5	213.7	239.3	-172.1	637.8	6945.7	8.7
													CKO_F8_13.3.bmp	3.6	220.9	210.3	234.3	-55.5	791.2	8616	11.6
													CKO_F8_13.3.bmp	1	229.5	226	234	-84.3	231.9	2525	3.1
													CKO_F8_13.3.bmp	3.1	231.1	226.3	235	17.4	721.5	7857	9.9
													CKO_F8_13.3.bmp	2.9	230.5	225.3	237.7	-124.7	677.4	7376.7	9.3
													CKO_F8_13.3.bmp	3.7	236.3	219.3	241.7	180	868.1	9453.3	11.9
													CKO_F8_13.3.bmp	9.9	230.1	212.3	242.3	-143.8	2281.8	24849.3	32.4
													CKO_F8_13.3.bmp	4.7	228.5	216	251	-99.3	1070.3	11655.3	15.1
													CKO_F8_13.3.bmp	1.7	221.6	202.7	231.3	-170.5	386.6	4209.7	5.5
													CKO_F8_13.3.bmp	2.4	229.1	207	237.3	9.1	547	5956.7	7.6
													CKO_F8_13.3.bmp	2.6	229.8	194	237	-4.2	590.9	6435.3	8.1
													CKO_F8_13.3.bmp	3.8	232	225.7	239.3	-150.3	873.6	9513.7	12.1
													CKO_F8_13.3.bmp	1.6	220	207.3	226.7	-104	343.5	3740.3	5
													CKO_F8_13.3.bmp	7.1	224.8	219	229.3	20.8	1589.4	17308.3	23.2
													CKO_F8_13.3.bmp	2.8	224.9	216.3	240.7	-65.2	619.5	6746.3	8.7
													CKO_F8_13.3.bmp	5.6	225.1	201.3	234.3	-38.2	1261.1	13733.7	18.1
													CKO_F8_13.3.bmp	3.7	224.7	217	230.7	155.4	825.4	8988.7	11.8
													CKO_F8_13.3.bmp	3.9	225.9	213	233.3	-117.8	871.1	9486	12.5
													CKO_F8_13.3.bmp	2.4	224.7	212	231.3	-130.1	536.5	5842.3	7.6
													CKO_F8_13.3.bmp	10.7	226.8	209	253	-77.9	2415.4	26303.7	34.7
													CKO_F8_13.3.bmp	3.5	229.7	210.3	242.3	-99.2	801.7	8730	11.2
													CKO_F8_13.3.bmp	5.8	226.5	208.7	242	13.1	1310.3	14269.3	18.7
													CKO_F8_13.3.bmp	5.8	225.8	208.3	236	168.7	1306.6	14228.3	18.7
													CKO_F8_13.3.bmp	3.7	228.3	219	232.7	2.9	838.5	9131.3	11.8
													CKO_F8_13.3.bmp	3.6	229.3	217.3	236.7	152.1	821	8941	11.7
													CKO_F8_13.3.bmp	2.9	222.3	206.3	240.7	172.6	653.3	7114.7	9.4
													CKO_F8_13.3.bmp	3.2	224.9	209	233	13.6	722.9	7872.3	10.2
													CKO_F8_13.3.bmp	2.6	223.1	217.7	229	-121.3	573.6	6246	8.1
													CKO_F8_13.3.bmp	2.6	225.1	219.3	229.3	135	578.8	6303.7	8.1
													CKO_F8_13.3.bmp	5.1	222.7	214.7	229.3	-162.9	1145	12469	16.5
													CKO_F8_13.3.bmp	5.7	223.7	211	231.7	-152.6	1273.8	13872	18.6
													CKO_F8_13.3.bmp	2.6	221.7	210	228.7	-87.8	570	6207.3	8.1
													CKO_F8_13.3.bmp	8	225.7	209.3	231.3	148.9	1802.8	19632	26
													CKO_F8_13.3.bmp	3.5	224.8	209	240.3	-86.9	784.6	8544	11.3
													CKO_F8_13.3.bmp	4	226	210	247.3	166.3	913.3	9945.3	12.9
													CKO_F8_13.3.bmp	5.4	229.3	217	236.3	-170	1242.2	13527.3	17.6
													CKO_F8_13.3.bmp	2.7	226.8	205.3	236	-102.5	603.9	6577	8.5
													CKO_F8_13.3.bmp	3.2	224.4	215.7	231	-101.6	721.2	7853.3	10.3
													CKO_F8_13.3.bmp	6.6	227.1	218.3	237	-0.8	1501.7	16353	21.6
													CKO_F8_13.3.bmp	4.9	223.8	213.3	230.3	171.1	1089.2	11861	15.7
													CKO_F8_13.3.bmp	5.1	214.7	180	224.3	-83.7	1104.2	12025	16.7
													CKO_F8_13.3.bmp	7.6	223.2	188.3	233.7	-32.2	1700.8	18521.7	24.9
													CKO_F8_13.3.bmp	5.8	226.3	204.3	238.7	-43	1309.3	14258.7	18.7
													CKO_F8_13.3.bmp	2.8	229.4	220.7	238	-68.6	631.9	6881.7	8.9
													CKO_F8_13.3.bmp	5.5	227.8	219.7	233.7	0	1255.1	13667.7	17.8
													CKO_F8_13.3.bmp	4.6	224.7	198.7	233.3	-148.2	1031.6	11234.7	15
													CKO_F8_13.3.bmp	6.2	226	212	233.3	-110.4	1390.5	15142.3	20.1
													CKO_F8_13.3.bmp	2.5	229.6	221.3	235.3	-73.7	569.3	6199.3	7.7
													CKO_F8_13.3.bmp	2.3	228.2	220.7	237.7	-2.4	523.8	5704.3	7.3
													CKO_F8_13.3.bmp	2	230.8	220	247.7	-106.7	466.4	5078.7	6.3
